# Supplementary material for: Microhomology-mediated end-joining-dependent integration of donor DNA in cells and animals using TALENs and CRISPR/Cas9
Source: PubMed Central journal article supplement (PMC4263139; doi:10.1038/ncomms6560), 2014-11-20
Supplement: ncomms6560-s1.pdf [file ncomms6560-s1.pdf]

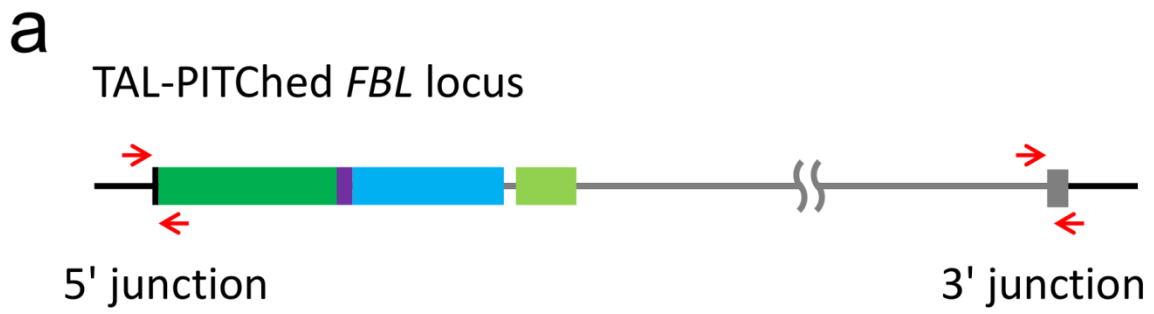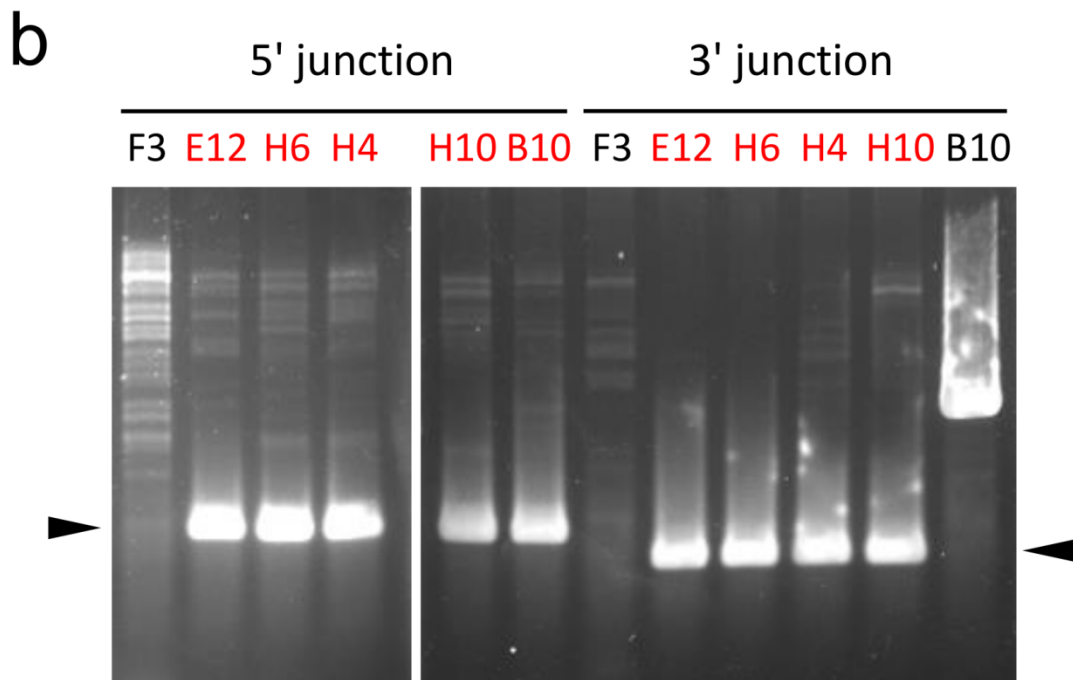

**Supplementary Figure 1 Genomic PCR analysis of TAL-PITChed cell clones at the *FBL* locus.** (a) Schematic illustration of the amplified genomic regions. Red arrows indicate primer annealing sites. (b) Gel images of the PCR products. Arrowheads indicate the expected positions of the amplicons from knocked-in alleles. Red letters indicate clone IDs showing the correct knockin bands.

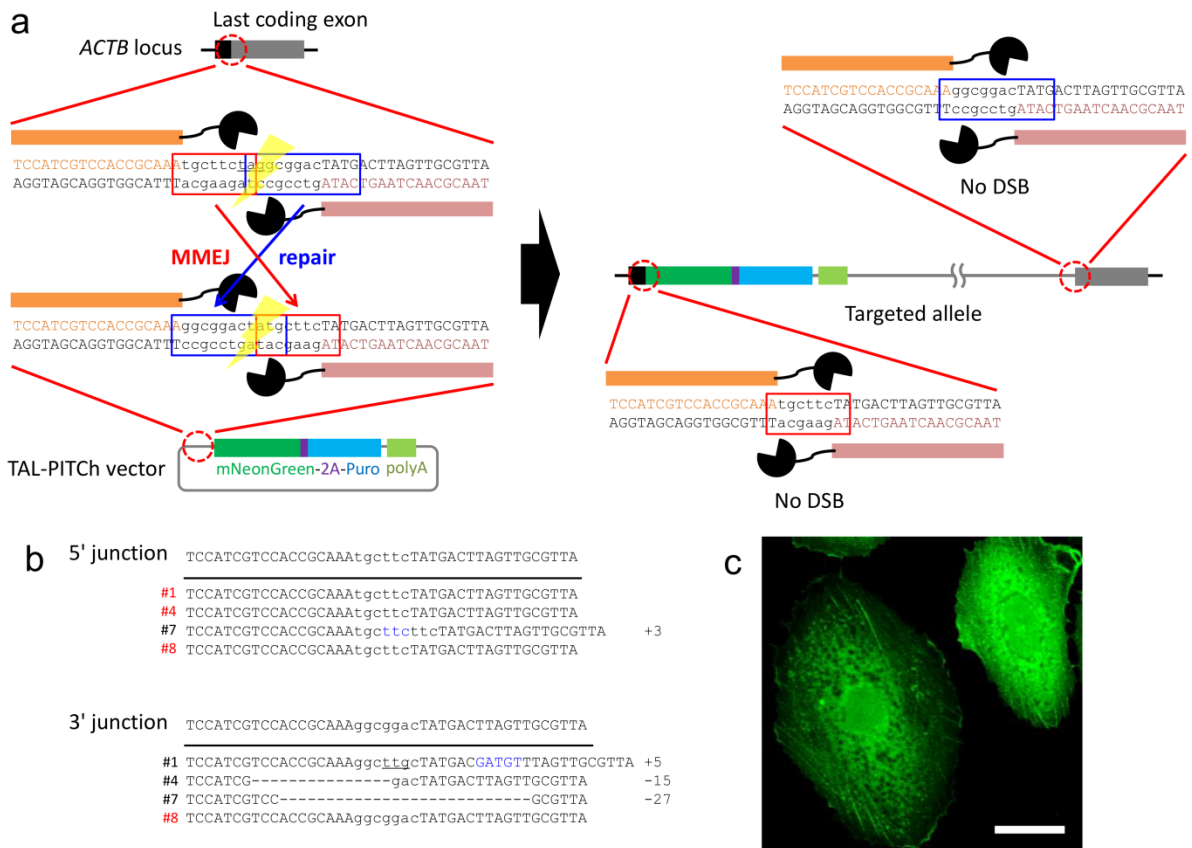

**Supplementary Figure 2 TAL-PITCh at the *ACTB* locus in HeLa cells.** (a) Schematic illustration of TAL-PITCh at the *ACTB* locus. Orange and pink letters indicate the left and right TALEN target sites, respectively. Red and blue boxes indicate the microhomologous sequences. The stop codon is underlined. (b) Sequences of knocked-in clones. The intended knocked-in sequence is shown at the top. TALEN target sites are shown in capital letters. Dashes indicate deletions. Blue letters indicate insertions. Substitutions are underlined. Red letters indicate correctly knocked-in clones. (c) Confocal laser scanning microscopy image of knocked-in cells (clone #8). Scale bar: 30  $\mu$ m.

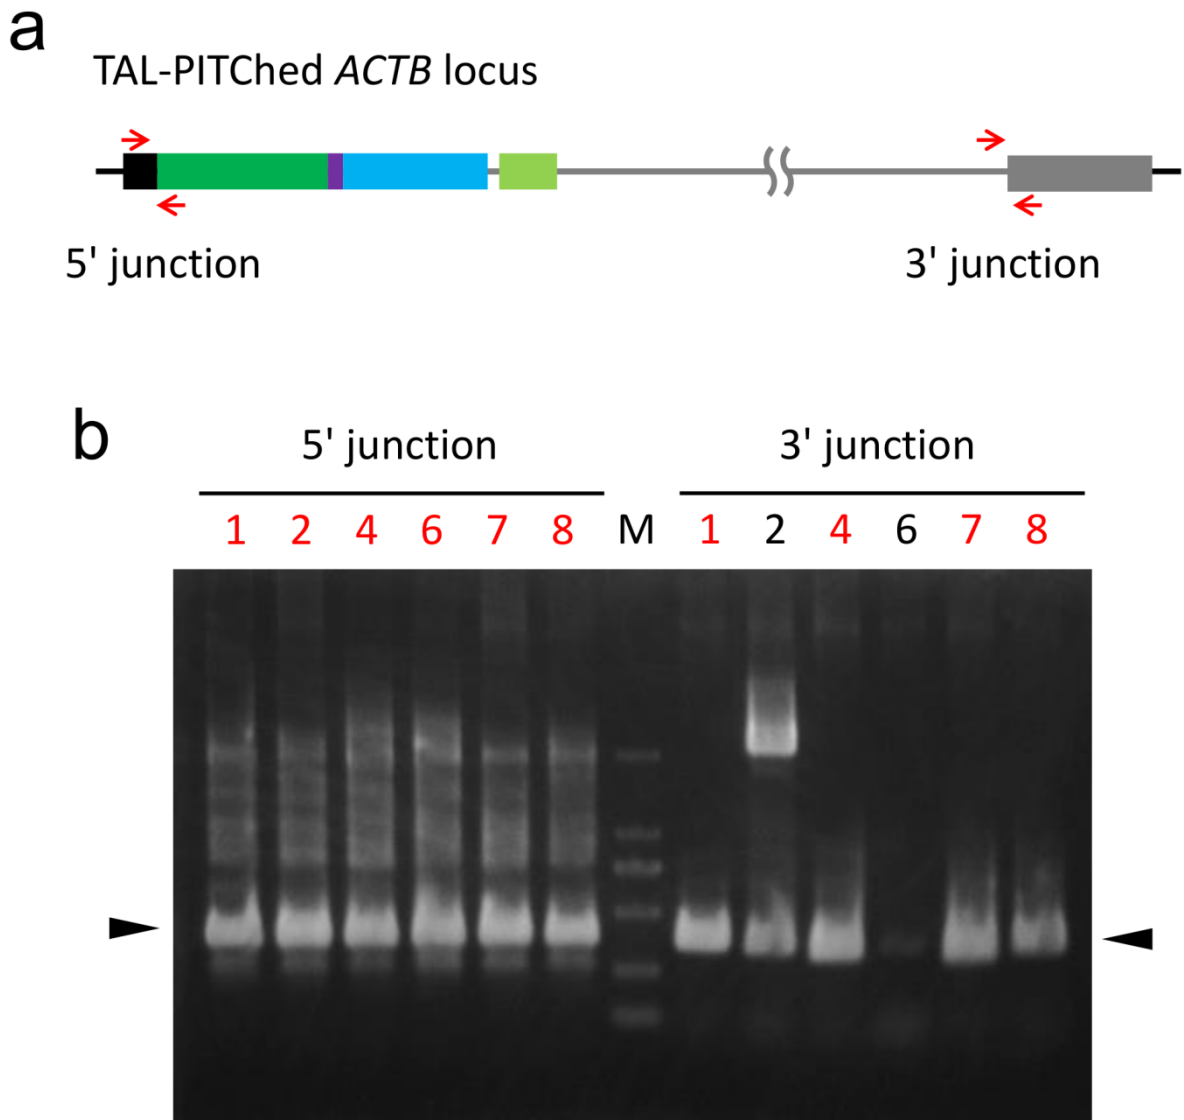

**Supplementary Figure 3 Genomic PCR analysis of TAL-PITChed cell clones at the *ACTB* locus.** (a) Schematic illustration of the amplified genomic regions. Red arrows indicate primer annealing sites. (b) A gel image of the PCR products. Arrowheads indicate the expected positions of the amplicons from knocked-in alleles. Red letters indicate clone IDs showing the correct knockin bands. M, Wide-Range DNA Ladder (100–2,000 bp) (Takara).



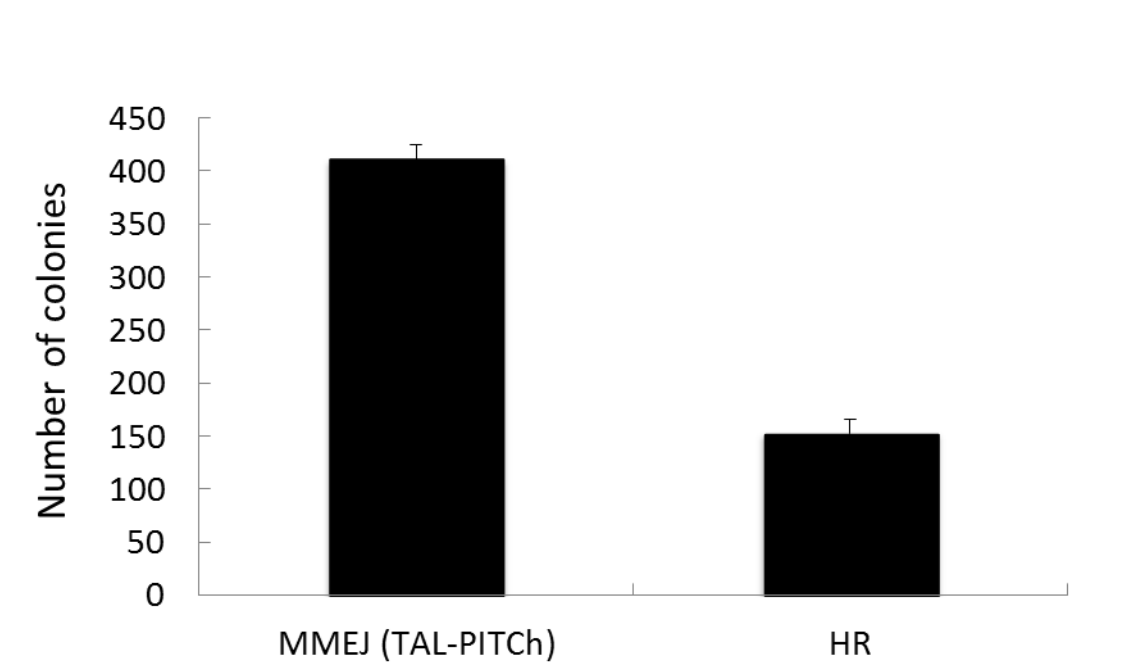

**Supplementary Figure 5 Comparison of colony-forming efficiencies between MMEJ- and HR-mediated gene knockin at the *ACTB* locus in HeLa cells.** For the MMEJ- or HR-mediated knockin, TALENs and TAL-PITCh vector or HR vector containing 1-kb homology arms were cotransfected and selected by puromycin. Numbers of all the colonies formed in 100-mm dishes showing fluorescence were counted. Data are expressed as means  $\pm$ SEM (n=3).

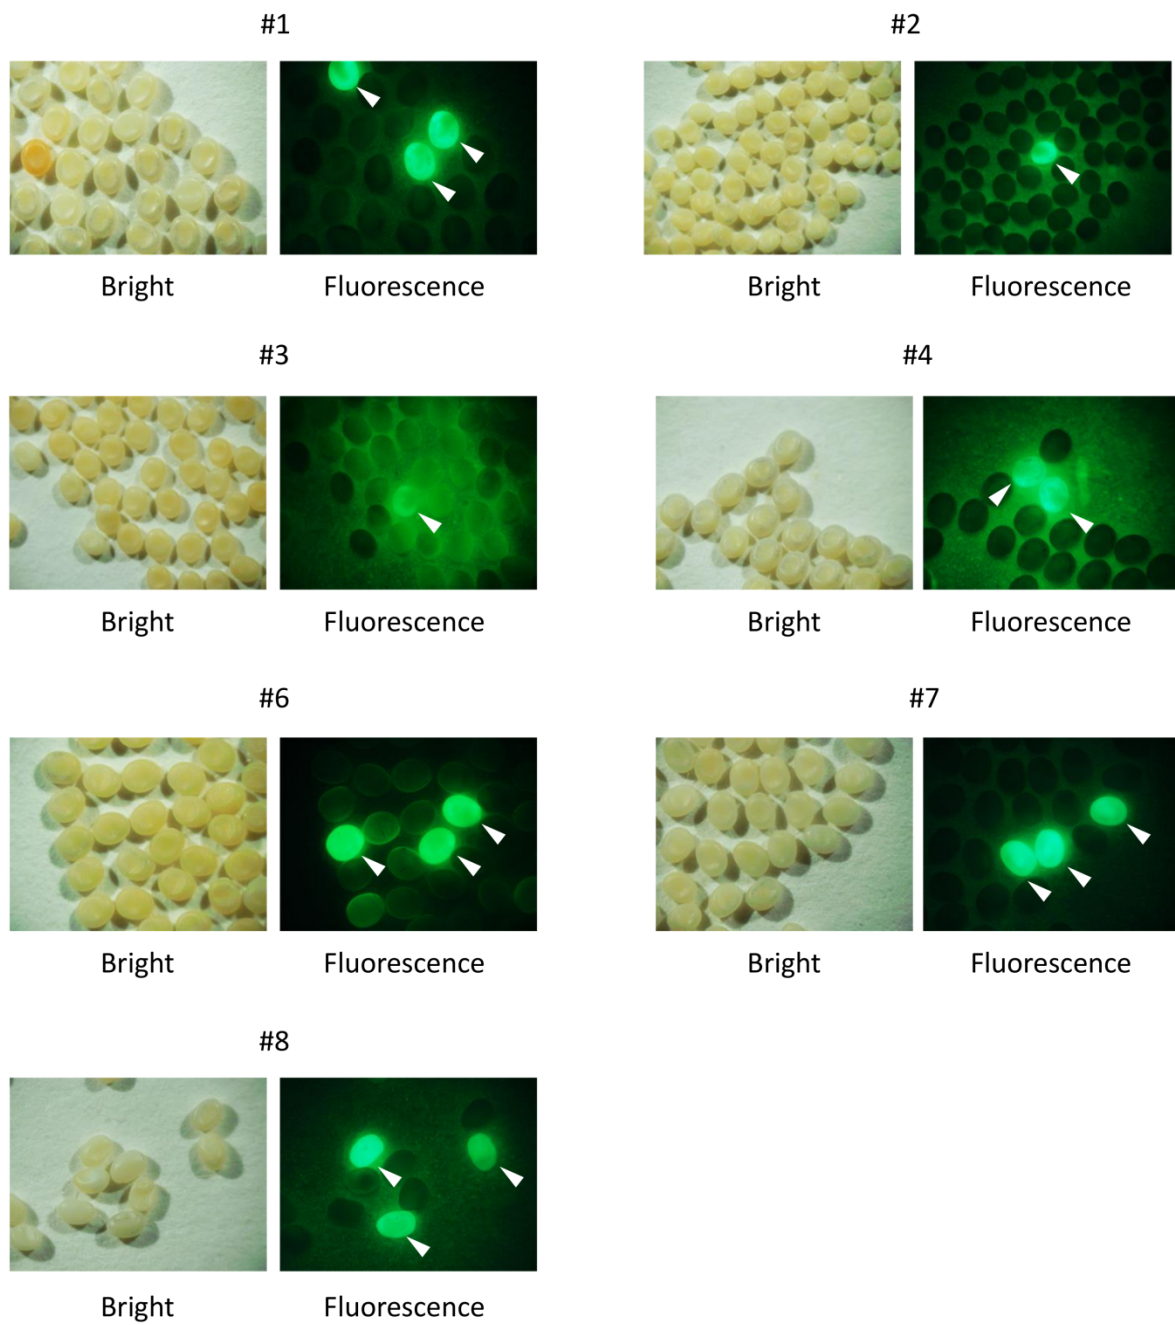

**Supplementary Figure 6 EGFP expression in the  $G_1$  embryos of TAL-PITChed silkworms.** Batches with EGFP-positive embryos, excluding #5, are shown. White arrowheads indicate EGFP-positive embryos.

a

5' junction

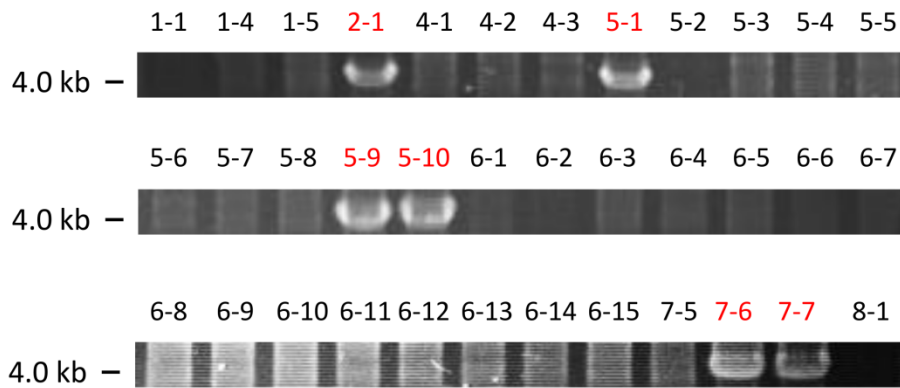

b

3' junction

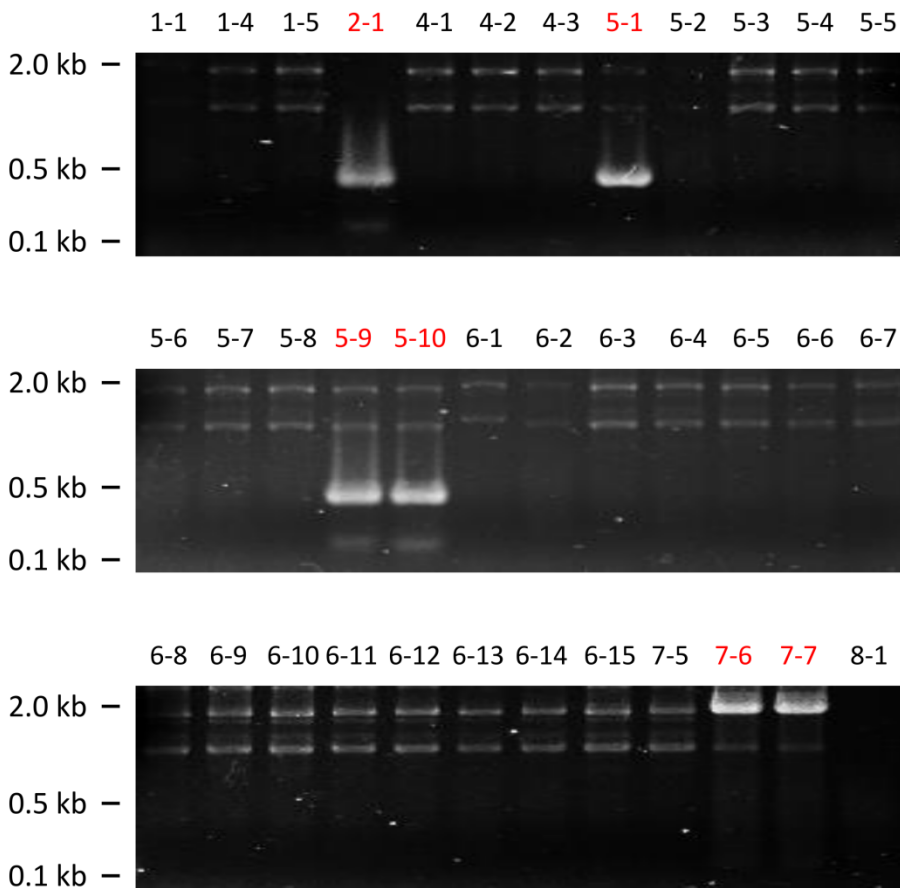

**Supplementary Figure 7 Genomic PCR analysis of TAL-PITCHed worms.** Gel images of the PCR products at the 5' (a) and 3' (b) junctions. Red letters indicate worm IDs showing the knockin bands.

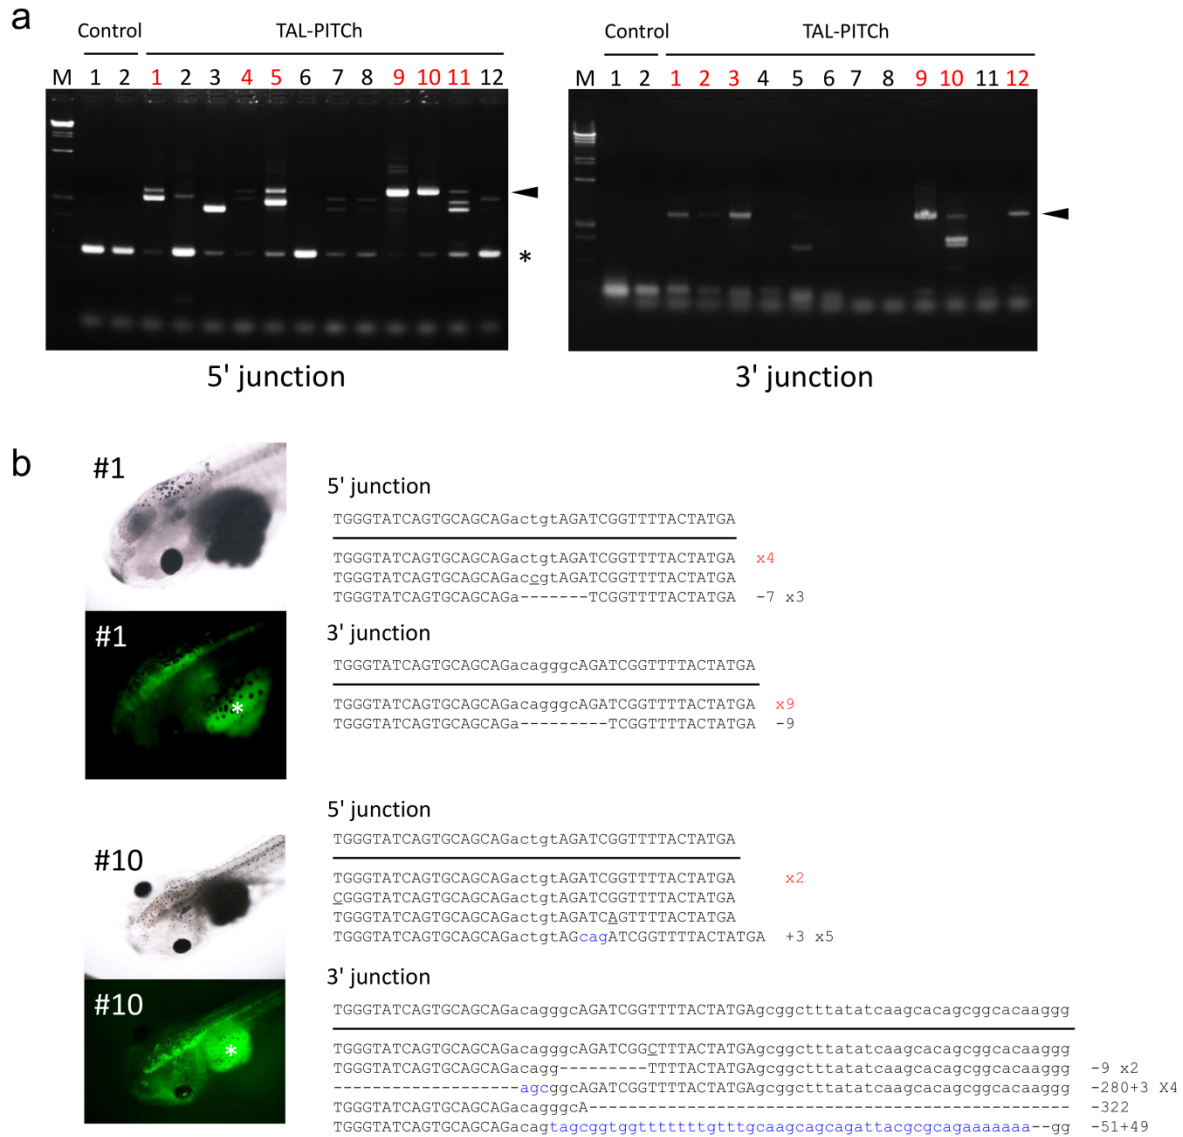

**Supplementary Figure 8 Genomic PCR and sequencing analysis of TAL-PITChed embryos at the *no29* locus.** (a) Gel images of the PCR products. Arrowheads indicate the expected positions of the amplicons from knocked-in alleles. Asterisks indicate non-specific bands. Red letters indicate clone IDs showing the correct knockin bands. M,  $\lambda$ DNA/HindIII+pUC/HinfI marker. (b) Microscopy images and sequences of the embryos #1 and #10. Asterisks indicate yolk autofluorescence. Red letters indicate correctly knocked-in alleles. Blue letters indicate insertions. Dashes indicate deletions. Substitutions are underlined.



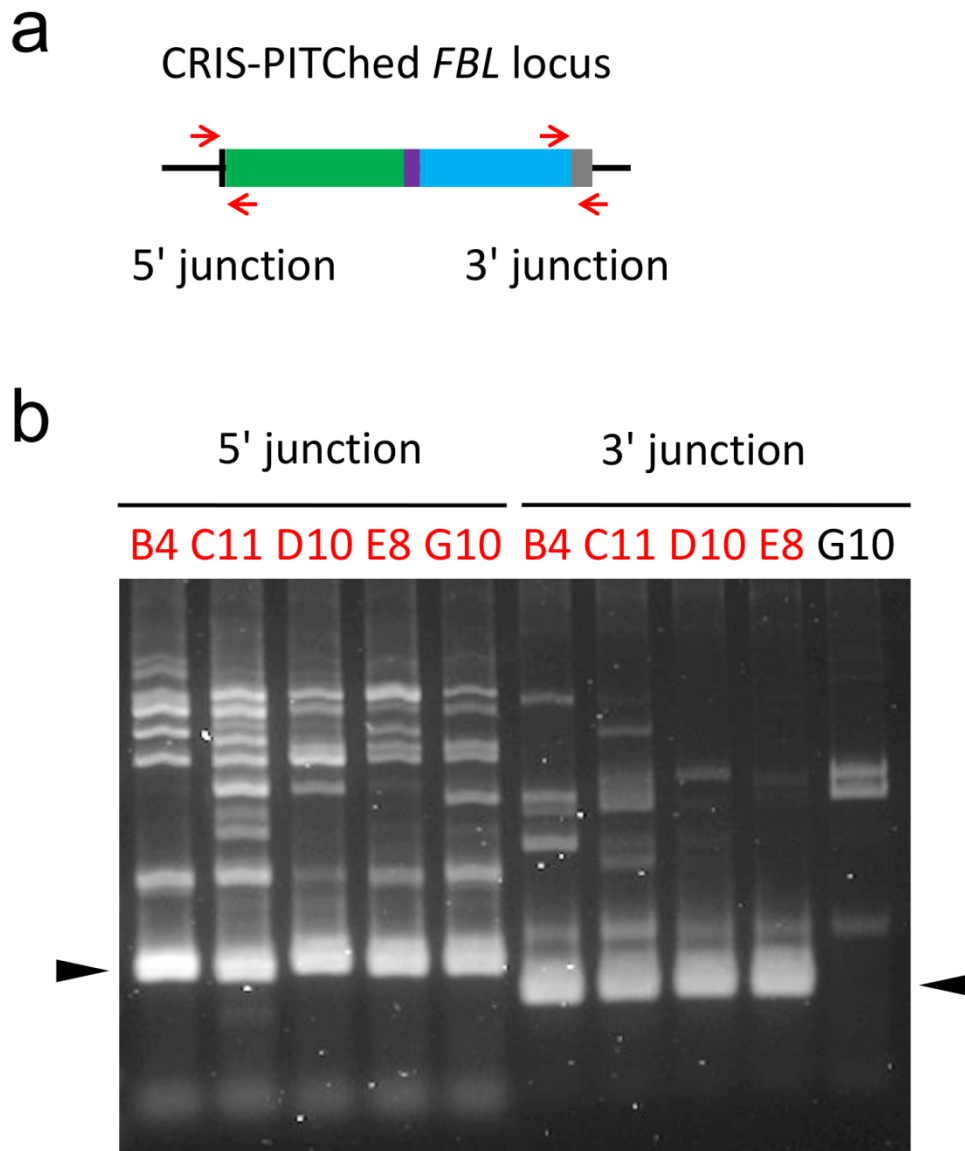

**Supplementary Figure 9 Genomic PCR analysis of CRIS-PITChed cell clones at the *FBL* locus.** (a) Schematic illustration of the amplified genomic regions. Red arrows indicate primer annealing sites. (b) A gel image of the PCR products. Arrowheads indicate the expected positions of the amplicons from knocked-in alleles. Red letters indicate clone IDs showing the correct knockin bands.

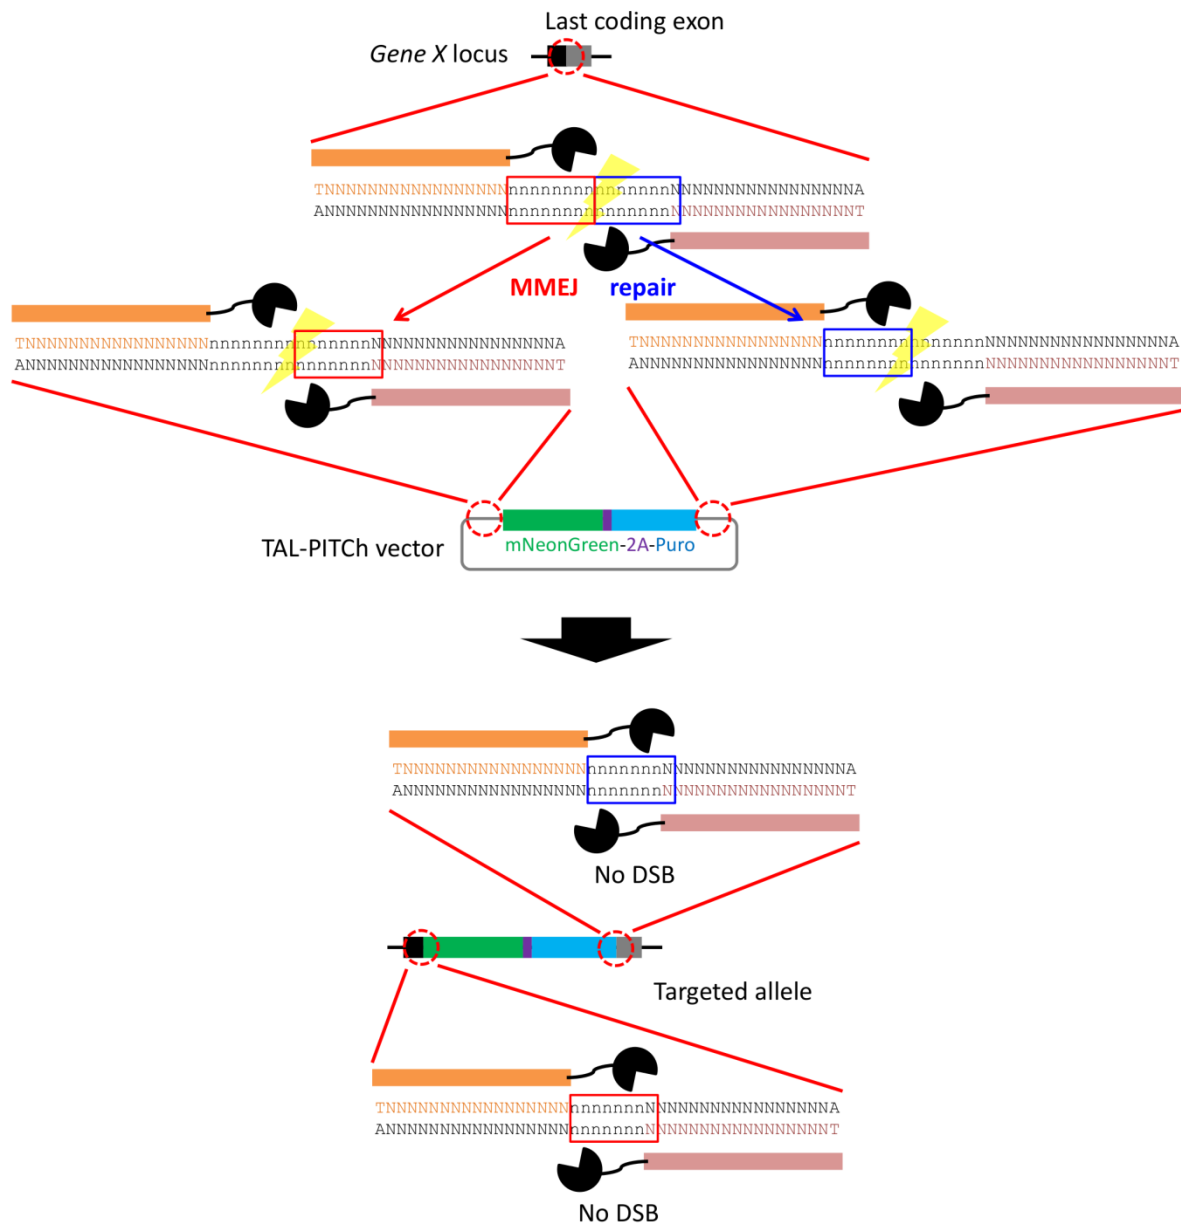

**Supplementary Figure 10 Possible design of TAL-PITCh for cassette integration.** For TAL-PITCh-mediated cassette integration, two TALEN target sites should be added at both ends of the cassette in the TAL-PITCh vector. The same TALEN set can be used to target three loci on the genome and on the TAL-PITCh vector. Orange and pink letters indicate the left and right TALEN target sites, respectively. Red and blue boxes indicate the microhomologous sequences.

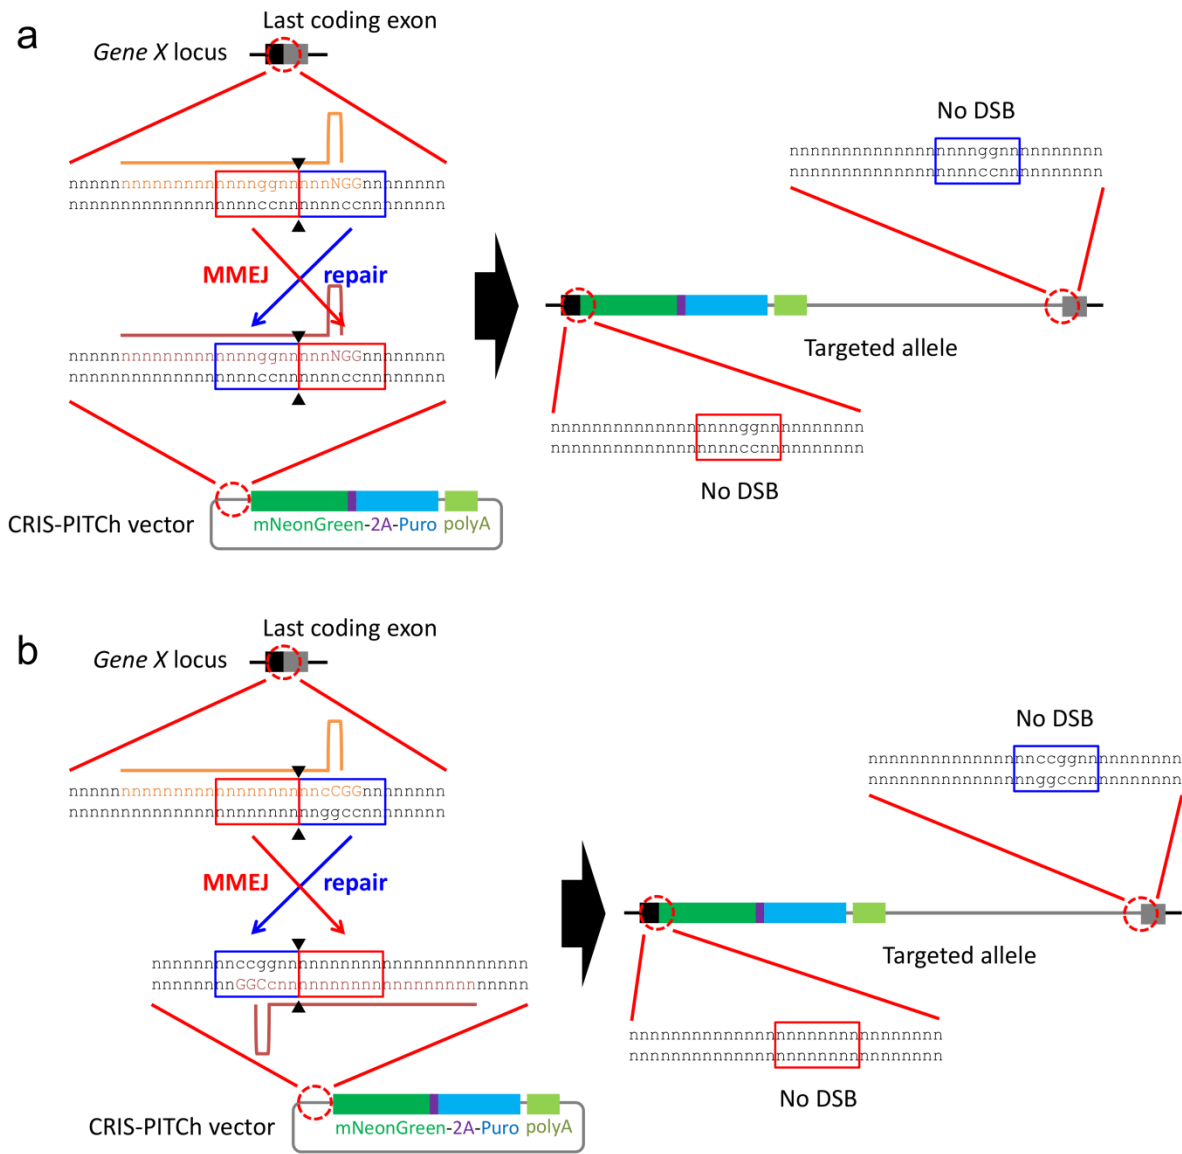

**Supplementary Figure 11 Possible design of CRIS-PITCH for full plasmid integration.** For CRIS-PITCH-mediated full plasmid integration, a single CRISPR/Cas9 site targeting the sense (a) or antisense (b) strand should be added to the CRIS-PITCH vector. The limitation of the genomic target sequence depends on which strand is targeted. Orange and pink letters indicate the gRNA target sites. Red and blue boxes indicate the microhomologous sequences.

>TAL-PITCh vector for the *FBL* gene

```
CTCATGACCAAAATCCCTTAAAGTGTACGCTGAGTTACGCGCGCGTCCACTGAGCGTCAGACCCCGTAGAAAAGATCAAAGGATCTTCTTGAGATCCTTTTTT
TCTGCGCGTAATCTGCTGCTTGAACCAAAAAAACCCCGTACCAGCGGTGGTTTGTGTTGCCGGATCAAGAGCTACCAACTCTTTTTCCGAAGTAAC
GGCTTACGACGAGCGAGATACCAAAATACGTGTTCTTCTAGTGTAGCGGTAGTTAGCCACCACCTCAAGAAGCTCTGTAGCACCAGCTACATACCTCGCTC
TGCTAATCTGTTACCAGTGGCTGCTGCCAGTGGCGATAAGTCGTGTTACCAGGTTGGACTCAAGACGATAGTTACCGGATAAGGCGCAGCGGTGGG
CTGAACGGGGGTTTCGTGACACAGCCAGCTTGGAGCGAACGACCTTACACCGAAGTACAGTACCTACAGCGTGTAGATACCTACAGCGGTGAGCTATGAGAAAGCGCCACGCTTCCC
GAAGGGAGAAAGCGGACAGGTATCCGGTAAGCGGCGAGGTCGGAACAGGAGCGCACAGAGGGAGCTTCCAGGGGAAACGCCTGGTATCTTTATAGTC
CTGTCGGGTTTCGCCACCTCTGACTTACGCTGATTTTTGTGATGCTCGTCAGGGGGGCGGAGCCTATGAAAAACGCCAGCAACCGCGCTTTTTACG
GTTCTTGGCCTTTTGGCTGGCCTTTTGTACATGTTCTTCCCTGCGTTATCCCTGATTTCTGTGGATAACCGTATTACCGCCTTTGAGTGAGCTGATACC
GCTCGCCGACGCGAACGACAGCCGAGCGAGGAGTCACTGAGCGAGGAGCGGAAGCGGAGAGTGGGAACTGCCAGGCATCAAACTAAGCAGAAGGCC
TGACGGATGGCCTTTTTGGCTTCTACAACTCTTCTGTGTTGTAAACGACCGCCAGTCTTAAAGTCTGGGCCCTTGGCGGTCTGTATAACGAGTAA
TCGTTAATCCGCAAAATACGTAATAAACCCCGCTTCCGGGGTTTTTTATGGGGGAGTTTAGGGAAAGAGCATTGTGAGAATATTTAAGGGCGCTGTC
ACTTTGCTGATATGAGAAATTTAACTTATAAATGAGAAAAAGCAACGCATTTAAATAAGATACGTTGCTTTTTCCGATTGATGAACACCTATA
ATTAACATTTCTATCTATTTATGATTTTTTGTATATACAATTTCTAGTTTGTAAAGAAATTAAGAAAAATAATCTCGAAAATAATAAAGGGAA
AATCAGTTTTTGTATATAAAATATACATGTCAACGATAATACAAAAATAATAACAACTATAAGATGTTATCAGTATTTATATCATTAGAAATAAAT
TTGTGTCGCCCTTAATGTGAGCGGATAACAATACGAGCTTTCATGCACAGTGGCGTTGACATTGATTATGACTAGTTAATTAAGTAATCAATACCG
GGTCATTAGTTTATAGCCATATATGGAGTTCGCGTTACTCTCACAGCCGCCCAACTGAAGAAGTGAAGTTACGGCTCTAGGAGTACCGGATCCCA
TGGTGTAGTAAAGGAGGAGATAAATATGGCTCCCTTCCCGCTACGACGAACTCCACATCTTCCGGTCAATCAACGGTGTGACTTGCACATGGTGGG
CCAGGGCACCAGCAATCCCAATGACGGATACGAAGAATCAATTTGAAGATACAAGGGCGGATCTCCAATTTCTCACCTTGGATTCTGGTTCGCCACAT
GGATACGGATTTACATGACTTCCCGTACCCGATGGGATGAGCCATTTACGGTGCATGGTGTAGATGGTAGCGGTTACCAAGTACACCGAATATG
AATTTGAGGACGGTGCCTCACTGACAGTGAATATCGGTATACTTACGAAGGAAGCCACATCAAGGGAGAGGCGACAGGTCAAAGGAACCGGATTTCCAGC
CGACGGGCGAGTATGACAACTCCCTGACCGCGCAGATTTGGTCCCGCAGCAAAAAGACCTATCCAATGACAAAGACCATTTATCTGCACATTTCAAAT
AGCTACACCCAGCGAAACGCAAGGCTATCGGTTACCGCCAGGACACACATTTGCAAAACCTATGGCCGCAAACTATCTGCAAAACACCGGAG
TGTATGTTTCCGAAAGACGGAATTAACACTCGAAACAGAACTAACTTTAAAGAGTGGCAGAAAGCCTTTACCAGCTAATGGGCATGGACGAGCT
GTAATAAGGAGGAGGAGAGGAGGAGGAACTGCTGCTAACATTCGGTGCAGTCGAGGAGAACTTGGACCTATGACCGAGTACAAGCCACCGTGCGCCTC
GCACCCGCGACGACGTCGCCCGGGCCGACCCCTCGCCGCGGTTTCGCGACTTACCCCGCCACCGCGCCACCGCTGCGACAGCCGACATCG
AGCGGGTACCGAGCTGCAAGACTCTTCTCACGCGCGTGGGCTCGACATCGGCAAGGTGTGGTTCGCGGACGACGGCGCGCGGTGGCGTCTGGAC
CACGCGGAGAGCGTCAAGCGGGGGCGGTTTCGCGGAGATCGCCCGCGCATGGCCGAGTTGAGCGGTTCGCGGCTGGCCGCGCAGCAACAGATGAA
GGCTCTTGGCGCGCAGTCCCGGCGGCGTACGACCCCTCGCCGCGGTTTCGCGACTTACCCCGCGTCTCGCGGCTCTCGCCGACCCAGGCGCAAGGTT
TGCTCCCGGAGTGGAGGCGGCGAGCGCGCGGGTTCGCCCTTCTTGGAGACTTCCGCGCCCGCAACCTCCCTTCTACGAGCGGCTCGCTTCC
CGTCAACCGCGAGCTGAGGTGCCCGAAGGACCGCGCACCTGGTGCATGACCCCGAAGCGCGGTGCCTGATCTAGAATGCTGATGGGTAGCAAAATCAG
CCTCGACTGTGCCCTTCTAGTGTGCCAGCCATCTGTTGTTTGGCCCTCCCGCTGCCCTTCTTACCCTGGAAGGTGCCACTCCCATCTGCTTTCCATA
AAATGAGAAATGCATCACAACTCAACCTATCTCGTCTATCTTGTATTATAAGGATTTTGGCATTTCGGCTATTTGGTAAAAATGAGC
TGATTTAACAAAAATTAACCGCAATTAATTTCTGTGGAATGTGTGTCAGTTAGGGTGTGGAAGTCCCGAGGCTCCCGAGGAGGAAAGTACGAAAG
ATGCATCTCAATTAAGTACGAAACCGTGTGGAAGTCCCGAGCTCCCGAGGAGGAGGAGTATGCAAAAGCATCTCAATTAAGTACGAAACATAG
TCCCGCCCTTAACTCCGCCATCCCGCCCTAACTCCGCCAGTTCGCCCATTTCCCGCCATGGCTGACTAATTTTTTTATTTATGACAGGCGGA
GGCCGCTCTGCTGAGCTATCCAGAAGTAGTGGAGGCTTTTTTGGAGGCTAGGCTTTTGAAGGCTCCCGGGAGCTTGTATATCCATTTTC
GGATCTGATCAGCAGCTGTATGAAAAGCTGAACTCACCGCGAGCTGCTGTCGAGAAGTTTCTGATCGAAAAGTTCGACAGCGTTTCGCGACTGTCG
TCTCGGAGGCGAAGAATCTGCTGCTTACGCTTCTGATGTAGGAGGCGTGGATATGCTTCCGGGTAATAGTGCGCCGATGGTTTCTACAAAGATCG
TTATGTTTATCGGCACTTTGCATCGGCGCGCTCCCGATTTCCGGAAGTGTCTGCATTTGGGAAATTCAGCGAGAGCTGACCTATGTCATCTCCCGCT
GCACAGGGTGTACGTTGCAAGACTGCTGAAACCGAAGCTGCCCGTCTTCTGCGAGCCGTCGCGGAGGCGCATGGATGCCATCGCTCGCCGCTTCTA
GCCAGACGAGCGGTTTCGCGCCATTCGACCGCAGGAATCGTCAATACACTACATGCGCTGATTTCTATATGCGGATTTGCTGATCCCATGCTATCA
CTGGCAAACTGTGATGGACGACACCGTCACTGCGTCCGTCGCGCAGGCTCAGATGAGCTGATGCTTTGGGCGGAGGACTGCCCGAAGTCCGGCACCTC
GTACACCGGATTTTCGCTCCAACTGTCTGACCGACAAATGCTGACCGACAAATGCGCCGATCAACAGCGGTCATGACTGGAGCGGCGATGTCGGGAT
AGGTTCGCAACATCTTCTTCTGAGGCGGTGGTGGTGTATGGAGCAGCAGCGCTACTTCCAGCGGAGGCGATCCGAGCTTGCAGGATCGCCGCG
GCTCCGGGCTATATGCTCCGATTTGGTCTTGACAACTCTATCAGAGCTTGGTTCAGCGCAATTTGATGATGACGCTTGGGCGCAGGCTCGATGGC
GCAATCGTCCGATCCGAGCCGGGACTGTCCGGGCTACACAAATCGCCCGCAGAAAGCGCGGCTTGGACCGATGGCTGTGAGAACTACTCGCCGATA
GTGAAACCGACGCGCCAGCACTGCTCCGAGGCGAAGGAATAGCAGTGTGTCAGGATTTGATTTCCACCGCGCTTCTATGAAAGTGGGCTCGG
AATCGTTTTCCGGGACGCGGCTGGATGATCTCCAGCGCGGGATCTCATGCTGGAGTCTTCCGCCACCCCACTTGTTTATGACGTTATAATGGT
TCAAAATAGCAATAGCACTACAAATTTCAAAATAAAGCAATTTTTTCAAGCAATTTCTAGTTGTGGTTTGTGCAAACTTCTAGTTGTGGTTTGTG
TCTGTATACCGTGCAGCTTCTAGTGTAGGCTTGGCGTATCATGCTATACCAATGCTTAATCAGTGAAGGACCTATCTCAGCGATCTGCTATTTCTG
CATCCATAGTTGCTGACTCCCGCTGCTGTAGATAACTACGATACGAGGAGGCTTACCATCTGGCCCGAGCGTCCGATGATACCGCGAAGAACCCGCTC
ACCGGCTCCGATTTTACAGCAATTAACACGACCGCGAAGGCGGAGGCGAGAAAGTGGCTTCCGCAACTTTATCCGCTCCATCCAGCTATTAATTTG
TGCCGGAAAGCTAGAGTAAGTGTTCGCCAGTAAATAGTTTGGCAACGTTGTTGCCATCGCTACAGGCATCGTGGTGTACGCTGCTGCTTGTATGG
CTTCATTCAGCTCCGTTCCCAACGATCAAGCGAGTTACATGATCCCCATGTTGTGCAAAAAGCGGTTAGCTTCCGCTCCCGATCGCTGTGTC
AAGTAAAGTTGGCCGAGTGTATACATCACTAGTTTATGGCAGCTGCAATAATCTTCTTACTGTATGCCATCCGTAAGATGCTTTTGTGACTGGAG
TACTCAACAAAGTCAATCTGAGAAATAGTGTATGCGGCGACCGGATGCTGCTTTCGCCGCGTCAATACGGGATAATACCGCGCCACATACGAGCA
AAGTGTCTCATATTTGAAACGTTCTTCCGGGCAAAACTCTCAAGGATCTACCCTGTTGAGATCCAGTTCGATTAACCCCATCTGTCACCAACTG
ATCTTCAAGTCTTTTACTTTTACCAGCGTTTCTGGGTGAGCAAAAAGCAAGGAAAGGCAAAAATGCCGCAAAAAGGAAATAAGGCGGACACGAAATTTGA
ATACTCATATCTTCTTTTCAATATATTAAGCAATTTATCAGGGTATTTGTCATAGCGGATACATATTTGAATGATTTAGAAAAATAAACAATA
TAGGGTCAAGTGTACAAACATTAACCAATCTGAACATTTATCGGAGCCATTTATACCTGAATATGGCTCATAACACCCCTTG
```

>TAL-PITCh vector for the *ACTB* gene

```
CTCATGACCAAAATCCCTTAAAGTGTACGCTGAGTTACGCGCGCGTCCACTGAGCGTCAGACCCCGTAGAAAAGATCAAAGGATCTTCTTGAGATCCTTTTTT
TCTGCGCGTAATCTGCTGCTTGAACCAAAAAAACCCCGTACCAGCGGTGGTTTGTGTTGCCGGATCAAGAGCTACCAACTCTTTTTCCGAAGTAAC
GGCTTACGACGAGCGCAGATACCAAAATACGTGTTCTTCTAGTGTAGCGGTAGTTAGCCACCACCTCAAGAAGCTCTGTAGCACCAGCTACATACCTCGCTC
TGCTAATCTGTTACCAGTGGCTGCTGCCAGTGGCGATAAGTCGTGTTACCAGGTTGGACTCAAGACGATAGTTACCGGATAAGGCGCAGCGGTGGG
CTGAACGGGGGTTTCGTGACACAGCCAGCTTGGAGCGAACGACCTTACACCGAAGTACAGTACCTACAGCGTGTAGATACCTACAGCGGTGAGCTATGAGAAAGCGCCACGCTTCCC
GAAGGGAGAAAGCGGACAGGTATCCGGTAAGCGGCGAGGTCGGAACAGGAGCGCACAGAGGGAGCTTCCAGGGGAAACGCCTGGTATCTTTATAGTC
CTGTCGGGTTTCGCCACCTCTGACTTACGCTGATTTTTGTGATGCTCGTCAGGGGGGCGGAGCCTATGAAAAACGCCAGCAACCGCGCTTTTTACG
GTTCTTGGCCTTTTGGCTGGCCTTTTGTACATGTTCTTCCCTGCGTTATCCCTGATTTCTGTGGATAACCGTATTACCGCCTTTGAGTGAGCTGATACC
GCTCGCCGACGCGAACGACGCGAGCGAGGAGTCACTGAGCGAGGAGCGGAAGCGGAGAGTGGGAACTGCCAGGCATCAAACTAAGCAGAAGGCC
TGACGGATGGCCTTTTTGGCTTCTACAACTCTTCTGTGTTGTAAACGACCGCCAGTCTTAAAGTCTGGGCCCTTGGCGGTCTGTATAACGAGTAA
TCGTTAATCCGCAAAATACGTAATAAACCCCGCTTCCGGGGTTTTTTATGGGGGAGTTTAGGGAAAGAGCATTGTGAGAATATTTAAGGGCGCTGTC
ACTTTGCTGATATGAGAAATTTAACTTATAAATGAGAAAAAGCAACGCATTTAAATAAGATACGTTGCTTTTTCCGATTGATGAACACCTATA
ATTAACATTTCTATCTATTTATGATTTTTTGTATATACAATTTCTAGTTTGTAAAGAAATTAAGAAAAATAATCTCGAAAATAATAAAGGGAA
AATCAGTTTTTGTATATAAAATATACATGTCAACGATAATACAAAAATAATAACAACTATAAGATGTTATCAGTATTTATATCATTAGAAATAAAT
TTGTGTCGCCCTTAATGTGAGCGGATAACAATACGAGCTTTCATGCACAGTGGCGTTGACATTGATTATGACTAGTTAATTAAGTAATCAATACCG
GGTCATTAGTTTATAGCCATATATGGAGTTCGCGTTACTCTCACAGCCGCCAAGGCGGACTATGCTTCTATGACTTGTGCTTGGTATCCATG
GTGAGTAAAGGAGGAGGAGATAAATATGGCTCCCTTCCCGCTACGACGAACTCCACATCTTCCGGTCAATCAACGGTGTGACTTGCACATGGTGGG
AGGCGCGGCAATCCCAATGACGGATACGAAGAATCAATTTGAAGATACAAGGGCGATCTCCAATTTCTACCTTGGATTCTGGCATTGGGATGG
ATACGGATTTTACATGACTTCCCGTACCCGATGGGATGAGCCATTTACGGTGCATGGTGTAGATGGTAGCGGTTACCAAGTACACCGAATATGCAA
TTTGAGGACGGTGCCTCACTGACAGTGAATATCGGTATACTTACGAAGGAAGCCACATCAAGGGAGAGGCGACAGGTCAAAGGAACCGGATTTCCAGCCG
ACGGGCGAGTACGAACTCCCTGACCGCGCAGATTTGGTCCCGCAGAAAGACCTATCCAATGACAAAGACCATTTCTGCACATTTCAAATTTGAG
CTACACCCAGCGAAACGCGAAACGCTATCCGTTACCGCCAGGACACCTACACATTTGCAAAAACCTATGGCCGCAAACTATGCAAAAACCGAGCGG
TATGTGTTCCGAAAGCGGAATTAACACTCGAAACAGAACTAACTTTAAAGAGTGGCAGAAAGCCTTTACCAGCTAATGGGCATGGACGAGCTGT
ATAAGGAGGAGCGGAGGAGGAGGAGTCTGCTAACATTCGGTGCAGTTCAGAGGAACTTGGACCTTACGCGAGTACAAGCCGCGCTCGCCCTCGC
```





GGAAGCTAGAGTAAGTAGTTCCGCCAGTTAATAGTTTGCAGCACTTGTGGCCATCGCTACAGGCATCGTGGTGTACGCTCGTCTGGTATGGCTTCA  
TTCAGCTCCGGTTCACCAACAGTCAAGGCGAGTTACATGATCCCCATGTTGTGCAAAAAAGCGGTAGTCTCCTCGGTCCTCGATGTCAGAAATGA  
AGTTGGCCGAGTGTATCACTCATGGTTATGGCAGCAGTGCATAATCTCTTACTGTCATGCCATCCGTAAGATGCTTTTCTGTGACTGGTGTACTC  
ACCAAGTCAATCTGAGAAATGTTGATGCGCGCAGCCAGTGTCTTGGCCGCGGTCAATACGGGATATAACCGCCACATAGCAGAACTTTAAAGATC  
CTCATCACTGGAAACCTTCTCGGGCGAAACCTCTCAAGATCTTACCGCTGTAGATTCAGGTTCCGATGTAACCCACTCGTGCACCAACTGATCT  
CAGCATCTTTTACTTTCCACCAGCTTTCTGGGTGAGCAAAAACAGGAAGCAAAATGCCGCAAAAAGGGAATAAGGGCGACACGGAAATGTTGAATACT  
CATATCTTCTCTTTTCAATATTATTGAAGCATTATATCAGGGTATTGTCTCATGAGCGGATACATATTTGAATGATTTGAAAAATAAACAAATAGGG  
GCAGTGTACCAACCAATTAACCAATTCTGAACATTATCGCGAGCCCAATTTATACCTGAAATATGGCTCATAACACCCTTG

>TAL-PITCh vector for the *BLOS2* gene

CGCGATCACCAAGTATAAGGAGCCGCGATCCTAGCCGCAACCTGAACAATAGTACCACCTGTTCTGTAGCGCCGCGACTCTAGATCATAATCAGC  
CATACCACATTTGTAGAGGTTTACTTGCCTTAAAAAACCTCCACACCTCCCCCTGAACCTGAAACATAAAATGAATGCAATTTGTTGTTAACTTGT  
TTATTGCAGCTTATAATGCTATGCTTTCTTTGTTCTGTAATGCTGTAATGCTGTAATGCTGTAATGCTGTAATGCTGTAATGCTGTAATGCTGTAAT  
CATCAATGTATCTTAAAGCTTATCGATACCGGTACAGATCTCAAAGAGGTCGACGCTATGTGCGGCAATATATATGACCCACTTTTATGCTTCAAAC  
ATTTTTACTGATGAGATAATTCGGAAATGTAATAATGGCAAAATGCTGAGATATCATTTGAAACGTCGGAAATCTATGACAGGTGTACTATTTCTGTAC  
ACGAATGAAGATGAAATCTATGCTTTCTTTGTTCTGTAATGCTGTAATGCTGTAATGCTGTAATGCTGTAATGCTGTAATGCTGTAATGCTGTAAT  
TGTCATGTTGTTAGTCTCTGTGTAATGAGTGTGATCTTTGATTTTTGATACGATGCTTAGAATGGATGACAAAAGTATACGGCCCACTTCGAGA  
AAACGATGATTTACTCTGTAGAAAAATATGGGATCTCTTTATCCATCAGTGCATCAAAAATTAACCTCCAGGGCTCATTGACCATAGATGAACAG  
TTACTTGGTTTTAGAGGACGGTGTCCGTTAGGATGTATATCCCAAAACAGCCAAAGTAAAGTATGGAATAAAAAATCCTCATGATGTGTACAGTGGTACGA  
AGTATATGATAAATGGAATGCTTATTGGGAGAGGAAACACAGACCAACGGAGTACCACCTCGGTGAATACTACGTGAAGGAGTATCAAAGCCTGTGCA  
CGGTAGTTGTCGTAATATTACGTGTGCAATTTGGTTCACCTCAATCCCTTTGGCAAAAACCTACTACAAGAACCCTATAAGGCCGCTCTAGCCATGGC  
TCAGTTTCGCTTTAAATATCGATAGTCTTTAAAAAAAATATGATGTGAAATCTGAAAAGGTTTGGCGCACTATGCGCTCATGCAATTTCAACTTTAATCA  
ATAGCCCTAAAGCAGTGTCCAAACAAATAAAAAATATTTATTGTAAGTGAATCAAAATTTGTCAGAAATTCATCGCTTCTTTGCTATTTTTATTA  
TGGTTTTGTTTTAAATATATTTAAACGTTGATGAAATAGTAAGATAATAGCATTTAAATTTACACCACCTTCGTAAGGTTTTCTGGCTAACTCGTTTT  
CAGTTTTGGTGGGATGAACTATGGGCTAAACTATTGCTGTGAGACTTTAACAGCTTTCATAAGGACGGGTGGATTTAACTCAAAAACAGCTTTGGAG  
GAAAGATTTGCTAATAGCCGCAAGTGTCTCCAAAAGGGGTTTAAATAGTACTAGGACAGTACTTTACGAGTGCATCTACTCCGTGTGAGAAAGTTA  
GAGCTCAGTATCATAAAAACGTCGACGAGTGTAGCTGAACCTGCTTTAATTTGCTTGGCGTTAAAATAGTAGTATAAGAACTGAGAACTGATGAA  
GATTTGTCATTTTAAAGATGAGACTAAAGATCTGTAGTTGTGCGAGACTTTAACAGCTTTCATAAGGACGGGTGGATTTAACTCAAAAACAGCTTTGGAG  
GAAAGATTTGCTAATAGCCGCAAGTGTCTCCAAAAGGGGTTTAAATAGTACTAGGACAGTACTTTACGAGTGCATCTACTCCGTGTGAGAAAGTTA  
GAGCTCAGTATCATAAAAACGTCGACGAGTGTAGCTGAACCTGCTTTAATTTGCTTGGCGTTAAAATAGTAGTATAAGAACTGAGAACTGATGAA  
GATTTGTCATTTTAAAGATGAGACTAAAGATCTGTAGTTGTGCGAGACTTTAACAGCTTTCATAAGGACGGGTGGATTTAACTCAAAAACAGCTTTGGAG  
ACAAATTTTATACAGGTTGATAGGAGAAACAGGAAACATTTTAAATGATTTCTGACATCTAAATGAACATAAAGATTTTACTTTTGTATGAAACAAA  
ACAAGTAACCTACATCTAAACTGAACGTTACTACGTTCTGGTTGCTAATTTGTAATTTTAACTCAATGTTTTCTCCAATTCGATTTATGATACAAATAAAG  
CTCATTTTCCGCTTTTCCCTCACTCCGGTTTTCACTATTCCGAGATAAATGTTGCCCAATTCCTATTTTCCGAAATTAAGATCTCTTTATTCGCGGAT  
CTAATCGATACATAGACATGATAAAAAGAAATCCAATATAAGTATTTCAACTGAATATCCTTTATAATCGCGCTATAATACAGGTTTATCTATAAAGCC  
TTGTTCCGACTAAGCGAGTATTTAGTCCGAGTACCGAGTAAATTTAGTAGCTTAAATGTTGTCGAGCACCAAAAGTTTGTGAGTGTGATGTAATAAATA  
TAGTAAAGCCAAATCCATTTTGTCTATTTTATCGGGCGAGTAGCGCTCCACCACCGCGTCTAGCTCACGCTCAGTAAACAAAGTCCGAACCTG  
TGTATTAGTCCGATTTACTAGTGGCGTCTCAATGGAATTTCCGACATCTTAAACTATCGAAGTATCTTTGGGATCTTCCAAATCGATTAATCTT  
TCAGAAGACATTTACTCTTCAATCGATCCATTTTCGTACCTATAACTTATTTTATAAATCAAGAAATTTGCTCGTCCACTTTCTTAAATAGCCAT  
TACGATTAGCTTAACTAGTTTATTCACTCTATTGCGTTGACGCTGTTCATCTCCGCAAAACACCCTCACCTGTGTACTCTACTGGACCGTAATGCGAAC  
GATTTCTGTCCAGTACGAGGATGTTTACGACATAATTTACTCGGTACTCGACTGCAATAACTCGCGCTAGTCCGAAACAGGCTTTAGCCGATTTTACGTA  
ACGTATACACCCCGATAAAGAGATTTACTGTCCAAAAGAACTGCAAAAATGAAACAAATTTAGTGGTTTTTATTTATGTTGATTAATTTCTGTTAA  
GAATTTTATCGGAAGCAGCCAGCGCCGAATGCGGTGAATAGTAAACATAAAGAAAGCGGTTGGAATGATCGGGTAAAATGTTATTTCTTACGAAT  
TAGCATGATTTCTGATTAATTTGAAAAAGTTTGGTGTCAAATTTAACTATCATCTGTTATGATCATTATTAGCCTCAATTTGCAACTAAGTTATTTCT  
TGTAATGTTAAAATTTGATGCTTTTCTAGAATTTCCAGAAATTTCCAGATTTCTGTGTGTAGATCGTATTGCCACTTTGCCAAATAGCCGCACT  
AAAATAATTCGGCAGAGCTATACAACATTTGGTAATTTTATTTATTTGCTATTTTCCCGAGTTTTTAAATTTACTGTGTTTTTAACTAGCAATTTACAT  
TAATTTGATGCAATTTTACTGCTTCAATAATTTTTTTTGTGTAATTTGGTTTCTTACGTTTATGCTGATATTTTAAAGTATTTGCAAAAATGCGAA  
ACACTGAAACCTTTAGGAAATTTAAATTTAGATGTTTCTTTACTTAAATAAATAAATAAATAAATAAATAAATAAATAAATAAATAAATAAATAAATA  
ATATTTTAGTGAATCTATTGATGAAATGAACGAAATATGTAATTTACCTTTATAAATTTCTGAAATTTTAAAGAAATATATTTTCTTAAACCTTTAA  
ACTTCAAAGCGGTTGATGCAATAAATAAATAAATAAATAAATAAATAAATAAATAAATAAATAAATAAATAAATAAATAAATAAATAAATAAATAAATA  
AATTTGCCAATTTAAATTTGAAATTTAAATTTTATTTTAAATTTGTTTCTGTTTGTGATTTGATTTGATTTGATTTGATTTGATTTGATTTGATTTGAT  
GAATCGAAGAACTTCTACTGATTCATAGATGTCGCTGTGCTAGAGGAAAGTATAAAAACGAATTTACACACCGCGCCCGGCTTATTGAACTAAGAGAAG  
TAGCGAGACTAACGTTTGTACTTTTGGCTTTGAAACACGCTGTGTAAAACCCCTCTAGTCAATTTTGTGTGAATTAAGCTAGTATTGGTGGACAGGCGGA  
GGAGCTTTACCGGGTGGTGGTGGTGGTGGTGGTGGTGGTGGTGGTGGTGGTGGTGGTGGTGGTGGTGGTGGTGGTGGTGGTGGTGGTGGTGGTGGTGG  
TACGGCAAGCTGACCTGAACTCATCTGACACCAGCGCAAGCTGCCCCTGCCCCTGCCCCTGCTGACCCCTGACCTACGGCTGACGCTGCTTCA  
CGCCTTACCCCGACCATGAAGCAGCAGCAGCTTCTCAAGTCCGCGATGCCCAGAGGCTACGTCAGGAGCGCACCATCTTTCTTCAAGGACAGCGGGA  
CTACAAGACCCGCGAGGTTGAAATTTGAGGGCGACACCTGCTGAAACCGCTGAGCTGAAAGGCAATCGACTGAAAGGCAATCGACTTCAAGGACCGGCA  
CACAGCTGGAGTACAATAACAACAGCCACACGCTCTATATCATGCGCACAAGCAGAGAAGCGGATCAAGGTGAATTCAGATCCGCCACAACATCG  
AGGACCGCAGCGTGCAGCTCGCCGACCACTACAGCAGAACACCCCATCGCCGACCGCCCGTGTCTGCTGCCCAGCAACCACTACCTGAGCACCAGCTG  
CGCCCTGAGCAAAAGACCCCAAGAGCGGATCAATGCTGAGTGTGAGTGGTGGTGGTGGTGGTGGTGGTGGTGGTGGTGGTGGTGGTGGTGGTGGTGG  
TAACTTAGTTCAGCCATACCAATTTGTAGAGGTTTACTTGTCTTAAAAAACCTCCACACCTCCCCCTGAACCTGAAACATAAAATGAATGCAATTTGT  
TGTGTTAACTGTTTATGTCAGCTTATAATGTTTACAAAATAAAGCAATGATCACAATAATTCACAATAAAGCATTTTTTTCACTGCATTTCTAGTTGT  
AGGTTGTCGCAAACTCACTAATGATATGATTAAGCCGTAATTTGTAAGGCTTAAATTTTGTGTAATAATTTGTTTAAATTTGCGGTAATTTTGTAAAT  
AACCAATAGCCGCAATTCGCAAAATCCCTTATAAATCAAAGAAATAGACCGAGATAGGGTTGAGTGTGTTCCAGGGCGGCCATAAAGTTTGTGTTAC  
TTTATAGAAGAAATTTGAGTTTTGTTTTTTTTTAAATAAATAAATAAATAAATAAATAAATAAATAAATAAATAAATAAATAAATAAATAAATAAATA  
ATAAACTTAAATCTATCTAATTAATAAATAAATAAATAAATAAATAAATAAATAAATAAATAAATAAATAAATAAATAAATAAATAAATAAATAAATA  
ACAATATGATTTCTTCTAGGTTAAATAATAGTTTCTAATTTTTTATTTTATTTTACAGCTGCTGCTGTAATACCGTATATCTCAACCGCTGCTGTGAGA  
TTGCTGATTTCTAGCTTTTGTAGTTTTTCCGCTCATCGACTTGATATTGTCGACACATTTTCTGTCGATTTGCGTTTTGATCAAAGACTTGAGCAGAGACA  
CGTTAATCAACTGTTCAAATTTGATCCATATTAACGATATCAACCCGATGCTGATATGTTGCGTAAATAATATTTTTTAAACCCCTTATACCTTTGCACTCT  
GCGTTAATACCGCTTCTGTGATACGACGTAATCATGTTTTCTTTTTGGATAAACTCCTACTGAGTTTGACCTCATATAGACCCTCACAAGTTGCAAAA  
CGTGGCAATTTTTTACCAATGAAGAAATTTAAAGTATTTTTAAAAAATTTTATCAGATTTAAAGAAGAACCAAAAATTAATATTTAATCGACCAGTTA  
ATCAACCGTGTACACAGAGCGCAAAAACACGCGAGCCGACGCTGTTGGCTAAAATTTAATAATCAACTTGTGTTATAGTCAAGATTTGCCCTCAACGTTG  
TCCCTAAAAAGTTGAAGACCAACAAAGTTTACGGACACTAGTAAATTTGATTTTGCCTTCAATTTTGGGATCACAATTTGTTATATTTTAA  
CAAAGCTTGGCACTGGCCGCTTTTACAACGCTGCTGACTGGGAAAACCTTGGCGTTTACCAACTTAACTGCCTTGCAGCAGATCCCCCTTTCCGCGACT  
GGCTAATAGCGAAGAGGCGCCACCGATCGCCCTTCCAAACAGTTGCGCAGCCCTGAATGGCGAATGGCGCTGATGCGGTTATTTTTCTCTTACGATCT  
GTGCGGTTATTACACCGCATATGGTGCATCTCAGTACAACTGCTGCTGATGCGGATAGTTAAGCCAGCCCGACACCCGCAACACCCGCTGACGCG  
CCCTGACGGGCTTGTCTGCTCCCGCATCCGCTTACAGACAAGCTGTGACCGCTCCGGGAGCTGCATGTGTGACAGGTTTTCCACCGTCACTACCAGGAA  
GCGCGAGCAAGAAAGGCGCTCGTATACGCTATTTTTTATAGTTTAACTGATGATATAAATGTTTCTTAGAGCTCAGGTGGGCTTTTTCCGGGAAATGT  
GCGCGAACCCTTATTTGTTATTTTTCTAATAATCAATCAAAATATGATCCGCTCATGAGACAATAACCTGATAAATGCTTCAATAATATTTGAAAAAG  
AAGAGTATGAGTATCAACATTTCCGCTGCTCCCTTATTTCCCTTTTTTGGGCAATTTTGCCTTCTGCTTCCCAACCCAGGCTGTTGAAAGTAA  
AAGATGCTGAAGATCAAGTTGGTGGTGCAGAGTGGGTTACATCGCACTGGATCTCAACAGCGGTAAGATCCTTGAAGTTTTTCCGCCAAGAAAGCTTTTCC  
AATGATGAGCACTTTTAAAGTCTGCTATGTGGCGGATATATCCCGATTTGACGCGCGGCAAGAGCAACTCGGTGCGCCGATACATATCTCAGAAAT  
GACTTGTGTAGTACTCAGCTCAGTACAGAAAGCATCTTACGATGACATGACAGTAAGAAATTTATGCACTGTGCCATTAACCATGATGATCAACTG  
CGGCCAACTTACTTCTGACACAGATCGGAGGACGAAAGGACTAACCCTTTTTTGCACAACATGGGGATCATGTAACCTGCTTGTATGTTGGGAACC  
GGAGCTGAATGAAGCCATACCAACAGCAGGCTGACACACAGTGCCTGTAGCAATGGCAACACGTTGCGCAAACTTAACTTGGCGCAACTACTTACT  
CTAGCTTTCGCGCAACAAATTAATAGACTGGATGGAGCGGATAAAGTTGTAGGACCACTTCTGCTGCTCGCCCTCCGCTGCTGCTGATGTTGTTGTA  
AATCTGGAGCCGGTGAAGCTGGTCTCGCGGTATCATTGCAAGCACTGGGGCCAGATGGTAAAGCCCTCCCGTATCGTAGTTATCTACACGAGCGGGAGTCA  
GGCAACTTAAAGTAACTGAAATAGACAGATCGCTGAGATAGGTCCTCAGTAAAGCATTGGTAACTGTCAGACCAAGTTACTCATCTTACTTTAG  
ATTTGATTTAAAGTAACTTAAATTTTAAATTTAAAGGATCTAGTGAAGACTTTTTTGTATAATCTCATGACCAAAATCCCTTAACTGATTTTTCTCCACT  
GAGCGTCAGACCCGATAGAAAAGATCAAAGGATCTCTTGGAGATCTTTTTTCTGCGGTAATCTGCTGCTTGCACAAAAAAAACCCGCTACCGC

GGTGGTTTGTTCGCCGATCAAGAGCTACCAACTCTTTTTCCGAAGGTAAGTGGCTTCAGCAGAGCGCAGATACCAAATACTGTCTTCTAGTGTAGCCG  
TAGTTAGGCCACCACTTCAAGAACTCTGTAGCACCGCTACATACCTCGCTCTGCTAATCCTGTTACCAGTGGCTGCTGCCAGTGGCCGATAGTGTGTGTC  
TTACCGGGTTGGACTCAAGACGATAGTTACCGGATAAGCGCAGCGGTGGGGTGAACGGGGGTTTCGTGCACACAGCCAGCTTGGAGCGAACGACCTA  
CACCAGACTGAGTACTACAGCGTAGCATTGAGAAAGCGCCACGTTCCCGAAGGAGAAAGGGCGACAGGTTATCCGGTAAGCGGAGGTTCCGGAACA  
GGAGCGCACAGGGGAACTTCCAGGGGAAACGCCCTGGTATCTTTATAGTCTTCGCGGTTTCGCCACCTTGTACTTGGCTCGAATTTGTGATGCT  
CGTCAGGGGGGGGAGCCTATGAAAAACGCCAGCAACCGGCCCTTTTTACGGTTCCTGGCCTTTTGTGGCCTTTTGTGCACATGTTCTTTCTGCGTT  
ATCCCTGATTTCTGTGATAACCGTATTACCGCCTTTGAGTGTAGCTGATACCGCTCGCCGAGCCGAACAGCCGAGCGCAGCTAGTGTAGCGAGGAA  
CGGGAAGAGCGCCCAATACGCAACCGCCTCTCCCGCGGTTGGCCGATTCATTAATGCAGCTGGCACACAGGTTTCCCGACTGGAAGCGGGCAGTG  
AGCGCAACGCAATTAATGTGAGTTAGCTACTCATTAGGCACCCAGGCTTTACACTTTATGCTCCGGCTCGTATGTTGTGGAATTTGTAGCGGATA  
ACAATTTACACAGGAAACAGCTATGACCATGATTACGAATTTGATCTCTAGCTAGAGTGCAGCTCGCCGACTTGGTTTGGCACTTTAGCGCGCGT  
CGCGTACACAGCTTGGCCCAATGTGGTTTTTGTCAACGAAAGATTCTATGACGTGTTAAAGTTTAGGTCGAGTAAAGCGCAAACTTTTTTAAACCT  
AGAAAGATAGTCTGCTAAAATTGACGCATGCATTTCTGAATATTGCTCTCTCTTTCTAAATAGCGCAATCCGTCGCTGTGCATTTAGGACATCTCAG  
TCGCGCTTGGAGCTCCCGTGGCGGTGCTTTGTCATGCGGTAAGTGTACATGATTTTTGAACTATAACGACCCGCTGAGTCAAAATGACGCATGATTATC  
TTTTACGTGACTTTAAGATTTAATCTATACGATAATTAATTTGTTATTTCTGTTCTACTTACGTGATAACTTATTATATATATATTTTTCTTGTATAG  
ATATCAAGCTTATCGATACCGTCGACCTGAGGGGGGGCCGTTACCAAGATCTAATTCGAG

>TAL-PITCh vector for the *no29* gene  
TGGGTATCAGTGCAGCAGCAGGGCAAGACTGTAGATCGGTTTTACTATGAGCGGCTTTATATCAAGCAGCAGCGGCACAAGGGCCCGGAGCCAGCAAT  
TGAGTCTCTATTTATTTGGCTGTGAATTTGTCATCAAAAACAAAACAATACACTTTTGGAGTAAATGAAGAGGATGATGCTGTGCACCTTGTGTGCTTACAG  
ACTATTAGTCTTGGGGCAGGAGCTAAGGATGAACACAAATGTAGTGGAAAGTACTGCGCCTAATTTATCAAAATAAGGAAGTTACAGTTCCTTTGGCGAACC  
TTAAACTTTCATGTCAGCCAAATGGTAAATGTGGATATTTTGGATTGAGGCACCCGTCACCTTTCCGTTTAACTCTGGTTCGTGTCAGTTTATCTC  
CGGTGCTCATTACGTTTACGCTGTAGCCAGTGTATGAAGACTGCTGGTTCAGAGGAAGAGATGGAAGATGATGGCGAGGAGGAGGATGATGATGAT  
GATGATGACGACGATGATGATGATGATGATGATGATGATGATGATGATGATGATGATGATGATGATGATGATGATGATGATGATGATGATGATGATGAT  
GATCCATCGCCACCATGGTGAAGCAGGGCAGGAGCTGTTCCAGCGGGTGGTGGCCATCTCTGGTCGAGCTGGACGGCGACGTTAACGGCCACAAGTTCAG  
CGTGTCCGGCAGGGCAGGGCAGGGCAGGGCAGGGCAGGGCAGGGCAGGGCAGGGCAGGGCAGGGCAGGGCAGGGCAGGGCAGGGCAGGGCAGGGCAGGGC  
ACCACCTGACCTACGGCGTGCAGTGTCTCAGCGCTACCCCGACCCATGAAGCAGCAGCAGCTTCTTCAAGTCCGCCATCGCCGAAGGCTACGTCACAGG  
AGCCACCATCTTCTTCAAGCAGCAGGCAACTACAAGCCCGCGCGAGGTGAAGTTCGAGGGCAGCACCCTGGTGAACCGCATCCGAGTGAAGGGCAT  
CGACTTCAAGGAGGACGGCAACATCTGGGGCACAAGCTGGAGTACAACAGCCCAAGCTCTATATCATGGCCGACCAAGCAAGAACGGCAGTAC  
AAGGTGAACCTCAAGTTCGCCCAACCATCGAGGACGGCAGCGTGCAGCTCGCCGACCCATACCAGCAGAACACCCCATCGCCGACGGCCCGCTGCTGC  
TGCCGCAACCACTACTGAGCAGCAGCCCTCGCCCTGAGCAAGACCCCAAGCAGAAAGCGGATCACATGGTCTGTGTGAGTTCCTGACCCCGCCGG  
GTCACTCTCGGATGAGCAGGCTGTACAAGTAAAGCGGCCGACTGTAGATATAATCAGCCATACCAATCAGCCATACCCATTTGTAGAGTTCTTGTCTTAAAA  
ACCTCCACACCTTCCCGTGAACCTGAAACATAAAATGAATGCAATTTGTTGTGTTAACTGTTTATGACGCTTATAATGGTTACAAATAAAGCAATTA  
CATCAAAATTTCAAAATAAAGCAATTTTTCTACTGCATTTCTAGTTGTGTTTGTTCGCAACTCATCAATGTATCTTAAAGCGTAAATTTAGCGTTA  
TATTTTGTAAAAATTCGCGTAAATTTTTGTTAAATCAGCTCATTTTTTAAACCAATAGGCCGAAATCGGCCAAATCCCTTATAAATCAAAAGATAGACC  
GAGATAGGTTGAGTGTGTTCCAGTTTGAACAAAGAGTCCACTATTAAGAAAGCTGGACTCCAACGTCAAAGGGCGAAAAACCGCTATACAGGGCGATG  
GCCACTACGTGAAACACCTTAACTCAAGTTTTTTGGGGTCGAGTGGCGTAAAGCACTAAATTCGGAACCCCTAAAGGGAGCCCGCATTTAGAGCTTG  
ACGGGAAAGCCGGCAACGTTGGCGAGAAAGGAAGGGAAGAAAGCGAAAGGAGCGGGCGTAGGGCGTGGCAAGTGTAGCGGTACGCTGCGCGTAACC  
ACCACACCCCGCGCTTAAATGCGCGCTACAGGGCGCGTCAAGTGGCCTTTTTCGGGAAATGTGCGCGGAACCCCTATTTGTTATTTTTCTAAATAC  
ATCAAAATATGATTCGCTCATAGCAAAATAACCTGATAAATGCTTCAATAATATTGAAAAAGGAAGTCTGAGGGCAAAACCAAGCTGTTGAAAT  
GTGTGTCAGTTAGGGTGTGGAAAGTCCCGAGCTCCCGCAGCAGGAGATGCAAAAGCATGCATCTCAATTAGTCAGCAACAGGTTGGAAAGTCC  
CAGGCTCCCGCAGCAGGAGATGCAAAAGCATGCATCTCAATTAGTCAGCAACCATAGTCCCGCCCTAACTCCGCCATCCCGCCCTAACTCCCGC  
CAGTTCGCGCTTCCCGCAGCCATGGCTGACTAATTTTTTTTATGAGAGGCGAGGCGCGCTCGCCCTGAGCTTATCCGAGAGTGTAGGAGG  
GGCTTTTTTGGAGGCTTAGGCTTTGCAAAAGTGCATCAAGAGACAGGATGAGGATCGTTTCGCATGATTGAACAAGATGGATTGCACGAGGTTCTCCG  
CGCGCTTGGGTGGAGAGGCTATTCGCGTATGACTGGGCACAACAGACAACTCGCTGCTGATGCCCGCTGTTCGCGCTGTACGCGAGGGCGCCGG  
TTCTTTTTGTCAAGACCTACCCCTGTTGCTGATCAGGATGATCTGGACGAAGAGCATCAGGGCTCGCGCCAGCCGAACCTGTTCCGCGAGGATGCC  
TGCTGCTCAGCTTGTCAAGCGGGAAGGACTGGCTGCTATTTGGGGAAGTGGCGGGCAGGATCTCCTGTCTATCTACCTTGTCTCTGCCGAGAAA  
GTATCATCATGCTGATGCAATCGCGCGCTGCATACGCTTGTACCGCTTACCTGCCATTCGACCAAGCGAAACATCGCATCAGGCGAGCAGCTA  
CTCGGATGGAAGCCCGCTTGTGCTGATCAGGATGATCTGGACGAAGAGCATCAGGGCTCGCGCCAGCCGAACCTGTTCCGCGAGGATGCCATGCC  
CGACGGCAGGATCTCGTGTGACCCATGGCGATGCTGCTTGGCAATATCATGGTGAATAATGGCCGCTTTTCTGGATTATCGACTGTGGCCGGCTG  
GGTGTGGCGGACCGCTATCAGGACATAGCTTGGCTACCGGTGATATTTGCTGAAGAGCTTGGCGCGCAATGGGCTGACCGCTTCTCGTGTCTTACGGTA  
TCGCGCTCCCGATTCGACCGCATCGCTTCTATCGCTTCTTACGAGTCTTCTGAGCGGACTTGGGGTTCGAAATGACCGAGCAGCGGACCGCC  
AACCTGCCATCAGGATTTGATTCACCGCCCGCTTCTATGAAAGTTGGGCTTCGGAATCGTTTTCCGGGACCGCGCTGGATGATCTCCAGCGCG  
GGATCTCATGCTGAGTTCCTCGCCACCTAGGGGGAGGCTAACTGAAGACCGGAAGGAGACAATACCGGAAGGAACCCCGCTATGACGGCAATAAAA  
AAGACGAATTAAGACCGAGCTTGGGTGTTGTTGTTCAAAAACCGGGGTTTCGTTCCCGAGGGCTGGCACTCTGTGATACCCCAAGGACCCCATAGG  
GGCAATACGCGCGGTTCTTCTTTTCCCAACCCACCCCAAGTTCCGGTGAAGGCCAGGGCTCGCAGCCACGTCGGGGCGCAGGCGCTGCCA  
TAGCCTCAGTACTCATATATACTTTAGATTGATTTAAAACTTCAATTTTTAAATTTAAAGGATCTAGGTGAAAGTCTTTTGTGATATCTCATGACCAA  
AATCCCTTAAAGTGGTTCGTTTCCCTTCCACTGAGCGTACAGCCCGTAGAAAAGATCAAAGGATCTTCTTGGAGTCTTTTTTCTGCGGTAATCTGCTGC  
TTGCAAAACAAAACACCGCTACAGCGGTGGTTGTTTGGCGGATCAAGAGCTACCAACTTTTTTCCGAGGTAAGTGGCTTACGACAGGCGCAG  
TACCAAAATACTGTCTTCTAGTGTAGCCGCTAGTTAGGCCACCACTCAAGAAGCTCTGTAGCACCCTACATACCTCGCTGTGTAATCTGTTTACCAGT  
GGTGTGCTGAGGCTGCGGATAAGTGTGCTTACCGGGTGGACTCAAGAGCATAGTTACCGGATAAGGCGAGCGCTCGGCTGAAACGGGGGTTGCTGC  
ACACAGCCAGCTTGGAGCAACGACCTACACGAACTGAGATACCTACAGCTGAGCTATGAGAAAGCGCCACGCTTCCGGAAGGAGAAAGGCGGACA  
GGTATCCGGTAAAGCGGAGGTCGGAACAGGAGCGCACGAGGAGCTTCCAGGGGAAACCGCTGGTATCTTTATAGTCTGTGCGGTTTCGCCACCT  
CTGACTTGAAGCTGCAATTTTTTGTGATGCTCGTCAAGGGGGCGGACTATGGAATAAACCGCAAGCAGCCGCTTTTACCGTTCCCTGGCCTTTTGTGCG  
CCTTTTGTCTCAGTGTCTTTCTGCTTATCCCTGATTTCTGTGATAACCGTATTACCGCATGCAT

>TAL-PITCh vector for the *fgk* gene  
TCAAGAAGTGAAGAGAAATAAACAACCTCAATACTGATAGAAGAGCATTATGGCCGGTCCACCATGGTGAAGCAGGGCAGGAGCTGTTCACGGG  
GTGGTCCCACTCCCTGGTTCGAGCTGGACGGCGACCTAAACGGCCACAAGTTTCAGCGTGTCCGGCAGGGCAGGGCGATGCCACCTACCGCAAGCTGACCC  
TGAAGTTCATCTGCACACCGCAAGCTGCCCTGGCCACCCCTGTCGACCCCTGACCTACGGCGTGCAGTGTCTCAGCCGCTACCCCGACCA  
CATGAAGCAGCAGGTTCTTCAAGTCCGCCATGCCGAAGGCTACGTCAGGAGCGCACCATCTTCTTCAAGGACGACGGCACTACAAGACCCCGCC  
GAGGTGAAGTTTCAGGGCGACACCCCTGGTGAACCGCATCGAGCTGAAGGGATCGACTTCAAGGAGGACGGCAACATCTTGGGGCACAAGCTGGAGTACA  
ACTACAAGCCCAACAGCTCTATATCATGCGCCACAAGCAGAAGACGGCATCAAGTTGAAGTTCAGAGTCCCGCACAACATCTCAGGACCGGACGGCTGCA  
GCTCCCGCACCATCTCAGCAGAACCCCTCAGGCGAGCCCGTGTGCTGCCGACAACCACTACTTGAACCCAGTCCGCTGAGCAGCCAGTGCAGCAAGAC  
CCCAACGAGAAGCGCGATCACATGGTCTGCTGAGGTTCTGTGACCGCCCGCGGATCACTCTCGCATGGACAGCTGTACAAGTAAAGCGCCCGACT  
CTAGAACTATAGTGTGCTATTACGTAGATCCAGACATGATAAGATACATTTGATGAGTTTGGACAAACCAACCTAGAATTCAGTGAATAAATAAGCTTT  
ATTTGTGAAATTTGTGATGCTATTTGTTGTAACCTTATTAAGCTGCAATAAACAAGTTTAAACAACAATTTGCAATTTATTTGTTTTCAGTTT  
AGGGGGAGGTTGGGAGGTTTTTAAATTCGCGCGCGCGGCCAATGCATTTGGGCCGGTACCCAGCTTTTGTTCCTTTTAGTGGAGGTTAATTGCGCGC  
TTGGCTTAATCATGGTATAGCTGTTTCCGTGTGAAATTTGTTATCCGCTCAACATTTCCACACAACATACAGGCGGAAGCATAAAGTGAAGGCTGGG  
GTGCTTAATGAGTGTAGTACTACATTAATTTGCTTGGCTTGGCTACTGCGCCCTTCCAGTCCGGGAAACCTGTGTCGCGACTGATTAATGATCCGCCA  
ACGCGCGGGGAGAGCGGTTTTGCTATTGGGCGCTTCTCCGCTTCTCGCTCACTGACTCGCTGCGCTCGGTCGTTCCGGCTGCGCGAGCGGTATCAGCT  
CACTCAAAGCGGTAATACGGTTATCCACAGAATCAGGGGATAACGACGAGAAAGAACTGTGAGCAAAAGGCCAGCAAAAGGCCAGGACAGCTAAAAGG  
CCGCGTTTCTGGCGTTTTTCCATAGGCTCCGCCCCCTGACGAGCAGCAAAAATCGACGCTCAAGTACGAGGTTGGCGAACCAGCAACCTATAAG  
ATACCAGGCGTTTTCCCGTGAAGCTCCCTCGTGGCTCTCTGTTCCGACCTTCCGCTTACCAGGATACCTGTCCGCTTTCTCCCTTCCGGAAGCGGTG  
CGCTTTCTCATAGCTCAGCTGTAGTATCTCAGTTCCGTTGAGTGTGCTGCTCAAGTGGGCTGTGTGCACGAACCCCGCTTCCAGCCGAGGCT  
CGCCCTTACCGGTAACCTTCTGTTGCTCAACCGGTAAGACGACTATTCGCCACTGGCAGCAGCCACTGGTAAACAGGATTTAGCAGGAGGCTA  
TGTAGGCGGTGCTACAGGTTCTTGAAGTGGTGGCTAACTACGGCTCACTAGAAGGACAGTATTGGTATCTGCGCTCTGCTGAAGCAGTTACCTTC



GGAAAAAGAGTTGGTAGCTCTTGATCCGGCAAACAACCACCGCTGGTAGCGGTGGTTTTTTTTGTTTGAAGCAGCAGATTACGCCGAGAAAAAAGGAT  
CTCAAGAAGATCCTTTGATCTTTTCTACGGGGTCTGACGCTCAGTGGAAACGAAAACCTCACGTTAAGGGATTTGGTTCATGAGATTATCAAAAAGGATCTT  
CACCTAGATCCTTTTAAATTAATAATGAAGTTTTAAATCAATCTAAAGTATATATGAGTAAACTTGGTCTGACAGTTACCAATGCTTAATCAGTGAGGCA  
CCTATCTCAGCGATCTGTCTATTTTCGTTTCATCCATAGTTGCCCTGACTCCCCGTCGTGTAGATAACTACGATACGGGAGGGCTTACCATCTGGCCCCAGTG  
CTGCAATGATACCGCGAGACCCACGCTCACCGGCTCCAGATTTATCAGCAATAAACCCAGCCAGCCGGAAGGGCCGAGCGCAGAAGTGGTCTGCAACTTT  
ATCCGCTCCATCCAGCTCTAATAATTGTTGCCGGGAAGCTAGAGTAAGTAGTTGCCAGTTAATAGTTTGCACAACGTTGTTGCCATTGCTACAGGCATC  
GTGGTGTACGCTCGTCTGTTGGTATGGCTTCATTCAGCTCCGGTTCCTAACGATCAAGGCGAGTTACATGATCCCCATGTTGTGCAAAAAGCGGTTA  
GCTCCTTCGGTCCCTCCGATCGTTGTGTCAGAAGTAAGTTGGCCGACGTGTATCACTCATGGTTATGGCAGCACTGCATAATTCTCTTACTGTCATGCCATC  
CGTAAGATGCTTTTCTGTGACTGGTGAGTACTCAACCAAGTCATTCTGAGAATAGTGTATGCGGCGACCCAGTTGCTCTTCCCGGCGTCAATACGGGAT  
AATACCGCGCCACATAGCAGAACCTTAAAGTGTCTCATTTGGAAAACGTTCTTCGGGGCGAAAACCTCTCAAGGATCTTACCGCTGTTGAGATCCAGTT  
CGATGTAACCCACTCGTGCACCCAACGTATCTTCAGCATCTTTTACTTTTCCAGCGTTTCTGGGTGAGCAAAAACAGGAAGGCAAAATGCCGCAAAAA  
GGGAATAAGGGGACACGGAATGTTGAATACTACTCTTCTCTTTTCAATATTATGAAGCATTATCAGGGTTATTGTCTCATGAGCGGATACATA  
TTTGAATGATTTAGAAAAATAACAATAAGGGTTCGCGCACATTTCCCCGAAAAGTGCCACCTAAATTTGTAAGCGTTAATATTTGTTAAAAATTCGC  
GTTAAATTTTGTAAATCAGCTCATTTTTTAACCAATAGGCCGAAATCGGCAAAATCCCTTATAAATCAAAAGAATAGACCGAGATAGGGTTGAGTGT  
GTTCCAGTTTGGAAACAAGAGTCCACTATTAAAGAACGTGGACTCCAACGTCAAAGGGCGAAAACCGTCTATCAGGGCGATGGCCACTACGTGAACCAT  
CACCTAATCAAGTTTTTTGGGGTCGAGGTGCCGTAAGCACTAAATCGGAACCTAAAGGGAGCCCCGATTTAGAGCTTGACGGGGAAAAGCCGGCGAA  
CGTGGCGAGAAAAGGAAGGAAAGCAAGGAGCGGGCGTAGGGCGCTGGCAAGTGTAGCGGTACGCTGCGCGTAACCACCACCCCGCGCTT  
AATGCGCGCTACAGGCGCGTCCATTGCCATTGAGGCTGCGCAACTGTTGGGAAGGGCGATCGGTGCGGGCTCTTCGCTATTACGCCAGTGACCA  
TAGCC

**Supplementary Figure 12 Full plasmid sequences of the TAL-PITCh, CRIS-PITCh, and HR vectors.** Green, purple, blue and red letters indicate the coding sequences of mNeonGreen/EGFP, 2A peptide, the puromycin resistance gene and no29, respectively. Light blue letters indicate the *hsp90* promoter. Target sites for TALENs and CRISPR/Cas9 are underlined.

**Supplementary Table 1. TAL-PITCh and CRIS-PITCh efficiencies in human cells.**

|            | Gene        | Cell line | PCR positive clone/total clone |             |                | Knockin with precise 5' junction | Knockin with precise 3' junction |
|------------|-------------|-----------|--------------------------------|-------------|----------------|----------------------------------|----------------------------------|
|            |             |           | 5' junction                    | 3' junction | Both junctions |                                  |                                  |
| TAL-PITCh  | <i>FBL</i>  | HEK293T   | 5/6                            | 4/6         | 4/6            | 4/4 (100%)                       | 4/4 (100%)                       |
|            | <i>ACTB</i> | HeLa      | 6/6                            | 4/6         | 4/6            | 3/4 (75%)                        | 1/4 (25%)                        |
| CRIS-PITCh | <i>FBL</i>  | HEK293T   | 5/5                            | 4/5         | 4/5            | 2/4 (50%)                        | 0/4 (0%)                         |

**Supplementary Table 2. Summary of silkworm experiments.**

| G <sub>0</sub> |                |                                              |  |  |  |  |
|----------------|----------------|----------------------------------------------|--|--|--|--|
| Eggs injected  | Hatched larvae | Adults crossed with non-injected individuals |  |  |  |  |
| 181            | 62             | 35                                           |  |  |  |  |

  

| G <sub>1</sub>                     |                                       |                       |                                 |                                  |                                  |  |
|------------------------------------|---------------------------------------|-----------------------|---------------------------------|----------------------------------|----------------------------------|--|
| Batches with EGFP-positive embryos | Total number of EGFP-positive embryos | Genotyped individuals | Knockin into <i>BLOS2</i> locus | Knockin with precise 5' junction | Knockin with precise 3' junction |  |
| 8                                  | 92                                    | 36                    | 6                               | 6 (100%)                         | 4 (67%)                          |  |

**Supplementary Table 3. Summary of the off-target analyses for TAL-PITCh.**

| Name      | Sequence*                                                                                                                                            | TALEN score** | Coordinate               | Genomic region | Mutation     |
|-----------|------------------------------------------------------------------------------------------------------------------------------------------------------|---------------|--------------------------|----------------|--------------|
| On-target | 5'- <u>TCCTGACAGCCGCTGA</u> ACTtcagttcttcacettGGGGGTGGCCTGTGAGA-3'<br>3'-AGGACTGTCCGACTTGAagtcaagaagtggaa <u>CCCCCACC</u> GGCAGACTCT-5'              | 100           | chr19:40325160-40325210  | Exon           |              |
| TAL-OT1   | 5'- <u>TCTCCAGGCCACCCCT</u> CggtcccagagtctcctcccCGTCCAGAGCTCTCAGGA-3'<br>3'-AGAGGGTCCGGTGGGAGccagggtctcagaggagg <u>GCAGGTCTCGAGAGTCCT</u> -5'        | 61.72         | chr5:42953443-42953497   | Intergenic     | Not detected |
| TAL-OT2   | 5'- <u>TCTCACATGCCACCCCA</u> CtcaatgggtggtgcttCTTTGAGCACTGTAAGGT-3'<br>3'-AGAGTGTACGGTGGGGTgagttaccaccacgaa <u>GAAACTCGTGACATCCA</u> -5'             | 58.44         | chr10:98256567-98256618  | Intron         | Not detected |
| TAL-OT3   | 5'- <u>TCTGACTGCACAGA</u> ACTggacaagagctagttGCTGGGTGGGTGGGGGA-3'<br>3'-AGGACTGACGTGTCTTGAactgttctcgatcaa <u>CGACCCACCCAACCCCT</u> -5'                | 56.82         | chr16:70751469-70751519  | Intron         | Not detected |
| TAL-OT4   | 5'- <u>TCCTGACCTCCCTGA</u> ACTccaccacottggcctcccaaAGTGCTGGGATTACAGGA-3'<br>3'-AGGACTGGAGGACTTGAaggtgggtggaaccggagggt <u>TCACGACCCCTAATGTCTCT</u> -5' | 56.56         | chr5:61711213-61711269   | Intron         | Not detected |
| TAL-OT5   | 5'- <u>TCACAAAAACACTGA</u> ACTtgagcaaatattgtcAGTCTGGGGTGGCAGGA-3'<br>3'-AGTGTTTTGTGACTTGAactcgttataacagTCAAGACCCCAACCCCTCT-5'                        | 56.3          | chr3:178104774-178104824 | Intergenic     | Not detected |
| TAL-OT6   | 5'- <u>TCTCACAGGCCACCACCA</u> agggtgtcagccagcCTGGGGTCTCCTTTGATA-3'<br>3'-AGAGTGTCCGGTGGTGGTcccacagtcggtccgGACCCAGAGGAAACTAT-5'                       | 56.11         | chr7:153319981-153320031 | Intergenic     | Not detected |

\*Red and blue letters indicate left and right TALEN target sequences, respectively. Mismatches are underlined.

\*\*TALEN scores were calculated by the PROGNOS tool (<http://baolab.bme.gatech.edu/cgi-bin/prognos/prognos.cgi>).

**Supplementary Table 4. Summary of the off-target analyses for CRIS-PITCh.**

| Name                                   | Sequence*                | Score** | Coordinate     | Strand | Mutation     |
|----------------------------------------|--------------------------|---------|----------------|--------|--------------|
| On-target<br>(gRNA on the genome)      | CTCTCACAGGCCACCCCCCAAGG  |         |                |        |              |
| CRIS-OT1A                              | CCCTCCAGGCCACCCCCCAAGG   | 3.6     | chr18:46206217 | -      | Not detected |
| CRIS-OT2A                              | TGATCACAGGCCACCCCCCATAG  | 2.3     | chr6:30796131  | -      | Not detected |
| CRIS-OT3A                              | CTCTCTCAGGCCACCCCTCCAGAG | 2.2     | chr11:76938544 | +      | Not detected |
| On-target<br>(gRNA at the 5' junction) | TGGATCCGTGGGGTGGCCCCGGG  |         |                |        |              |
| CRIS-OT1B                              | TGGCTCCGTGGGGTGGCCGCTGG  | 4.3     | chr10:29645541 | -      | Not detected |
| CRIS-OT2B                              | TTGCTCCTTGGGGTGGCCCCAGG  | 2.5     | chr22:38619312 | +      | Not detected |
| CRIS-OT3B                              | TGGATCTGGGGGTGGCCCCTGG   | 2.3     | chr3:133419488 | +      | Not detected |
| On-target<br>(gRNA at the 3' junction) | GGTGCCTGACCAAGGTGCCCGGG  |         |                |        |              |
| CRIS-OT1C                              | TGTGTCTGAGCAAGGTGCCAGG   | 2.5     | chr7:29849668  | +      | Not detected |
| CRIS-OT2C                              | GCTGGCTGGCCAAGGTGCCGAG   | 1.6     | chr15:61098465 | +      | Not detected |
| CRIS-OT3C                              | GGAGCCTGGGCAAGGTGCCAAG   | 1.4     | chr17:79974949 | +      | Not detected |

\* Red letters indicate PAM sequence. Mismatches are underlined.

\*\*Scores were calculated by the CRISPR design tool (<http://crispr.mit.edu/>).

**Supplementary Table 5. Oligonucleotides for gRNA templates.**

| Gene       | Target locus | Sense oligonucleotide (5'→3') | Antisense oligonucleotide (5'→3') |
|------------|--------------|-------------------------------|-----------------------------------|
| <i>FBL</i> | Genome       | caccgctctcacaggccacccccca     | aaactggggggtggcctgtgagagc         |
|            | 5' junction  | caccgtgatccgtggggtggcccc      | aaacggggccacccccacggatccac        |
|            | 3' junction  | caccgtgcctgaccaaggtgcc        | aaacgggcaccttggtcaggcacc          |

**Supplementary Table 6. Primers for PCR at the on-target sites.**

|                               | Gene         | Locus       | Forward primer (5'→3')       | Reverse primer (5'→3')       |
|-------------------------------|--------------|-------------|------------------------------|------------------------------|
| TAL-PITCh in human cells      | <i>FBL</i>   | 5' junction | acaccaagacagacatctctgtcccttg | atccgatccaatgtggggaac        |
|                               |              | 3' junction | gcccttaattgtgagcggataac      | tcagcaggtaaggggaggaatg       |
|                               | <i>ACTB</i>  | 5' junction | tggcctcgtgtccaccttc          | tgcagcctgaaatgggctcatc       |
|                               |              | 3' junction | tcgcccttaattgtgagcggataac    | gatgctcgtccaaccgactg         |
| CRIS-PITCh in human cells     | <i>FBL</i>   | 5' junction | acaccaagacagacatctctgtcccttg | atccgatccaatgtggggaac        |
|                               |              | 3' junction | ccgcaacctccccttctacgag       | tcagcaggtaaggggaggaatg       |
| TAL-PITCh in <i>B. mori</i>   | <i>BLOS2</i> | 5' junction | agcaaattgtgcaaggac           | ccgctcaggttaattcacacaaaatgac |
|                               |              | 3' junction | ataacgaccgctgagtgaa          | agctagccacagtggtttatc        |
| TAL-PITCh in <i>X. laevis</i> | <i>no29</i>  | 5' junction | agcataggeatctccctgatgtgtg    | ggtcttcatcatcactggctacaacg   |
|                               |              | 3' junction | gaaaggcggacaggtatccgtaag     | ggcttccaaaagctgcctgtctcta    |

|                   |             |             |                            |                            |
|-------------------|-------------|-------------|----------------------------|----------------------------|
|                   | <i>fgk</i>  | 5' junction | gtcaagaccattgtgaagaagt     | tcagcttgccgtaggtggcatcgc   |
|                   |             | 3' junction | ggcgctccattcgcatt          | agacctcaagactccaaggcaacg   |
| Southern blotting | <i>ACTB</i> | Outer probe | cgtgttctttgcactttctgcatgtc | tctccttaatgtcacgcacgatttcc |
|                   |             | mNG probe   | gcaccggcaatccaatgac        | gtttgccgtttccgggtggtg      |

**Supplementary Table 7. Primers for PCR at the off-target sites.**

|                                                                 | Locus     | Forward primer (5'→3')  | Reverse primer (5'→3')  |
|-----------------------------------------------------------------|-----------|-------------------------|-------------------------|
| TAL-PITCh<br>at the <i>FBL</i><br>locus in<br>HEK293T<br>cells  | TAL-OT1   | cgtgctgggagggaagtctgt   | ggcaggcctgaagtcgaggt    |
|                                                                 | TAL-OT2   | ggcgaccaccttgcttaagcag  | gccactgcacccggccatttt   |
|                                                                 | TAL-OT3   | ctcgctctgctgcacactac    | atgcgctgtggtctcagctactc |
|                                                                 | TAL-OT4   | tgccctgctaactgctctg     | tgggcaaaaagagcagaactc   |
|                                                                 | TAL-OT5   | cggcaatgtgtttgggcc      | cagcagactctggggaggat    |
|                                                                 | TAL-OT6   | atgatggttccagcttcatcc   | gaagcagatcctgtccaaaacc  |
| CRIS-PITCh<br>at the <i>FBL</i><br>locus in<br>HEK293T<br>cells | CRIS-OT1A | cttctgaatcctccttccatcc  | ttgattctaggccaattttgagg |
|                                                                 | CRIS-OT2A | atgcatgcaggattggaagac   | tataagccaacaaggcttcctg  |
|                                                                 | CRIS-OT3A | gccatctcctaactgccaatatg | atcatacagccactgagtcaca  |
|                                                                 | CRIS-OT1B | atggetgtgatctgagagtc    | ttctctggaaaaatgctctg    |
|                                                                 | CRIS-OT2B | agctctgcacctaagcctatcc  | gtgggggaagacctactctgtg  |
|                                                                 | CRIS-OT3B | taggtgatcagatggcttgag   | atcctgagtcgcggaaaaatac  |
|                                                                 | CRIS-OT1C | gcacatggactgtgagagtcag  | tatgctgggaatggagatgaac  |
|                                                                 | CRIS-OT2C | gctttgtaaagcctcctcttg   | tggtctggcctgatttagctg   |
|                                                                 | CRIS-OT3C | cactcaccactctgtgtcttcg  | acacatcagggtgaccacacac  |
